# Supplementary material for: The novel nematicide wact-86 interacts with aldicarb to kill nematodes
Source: PubMed Central journal article supplement (PMC5393889; doi:10.1371/journal.pntd.0005502), 2017-04-05

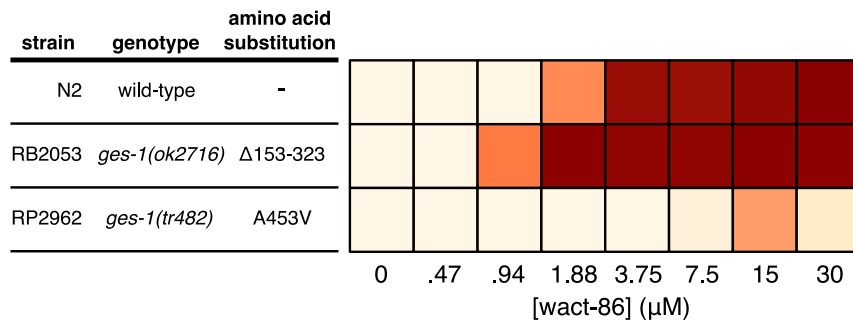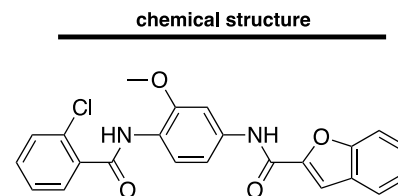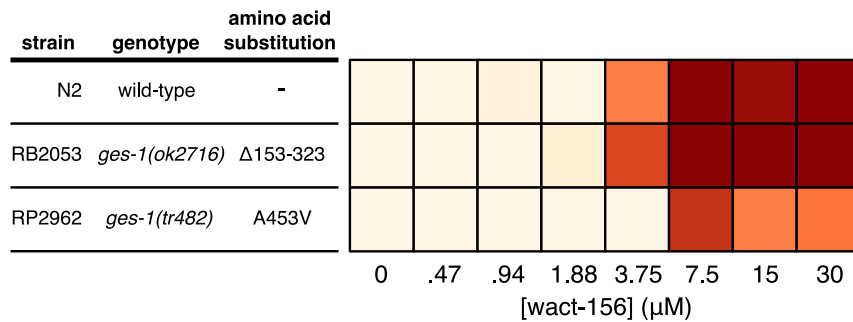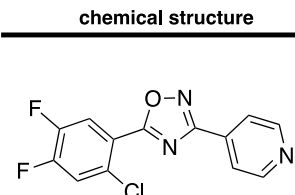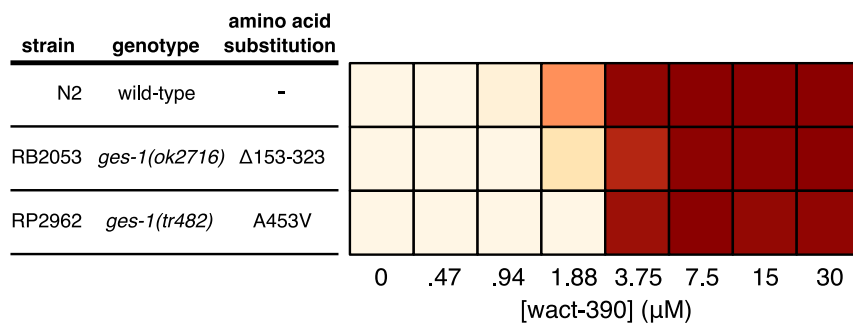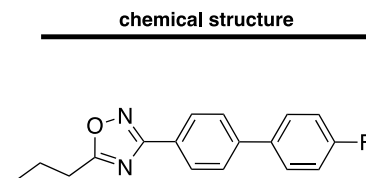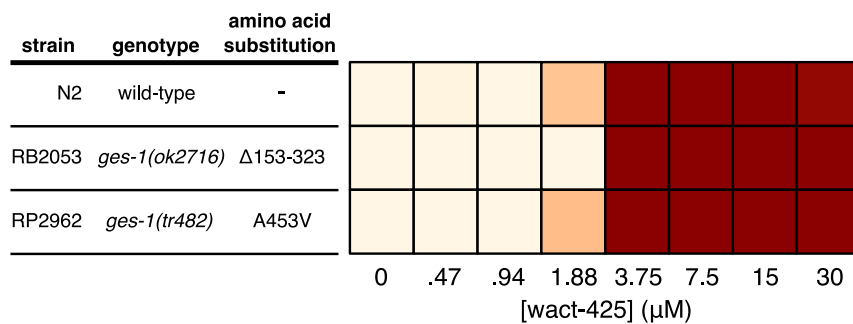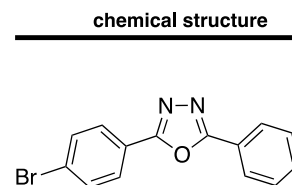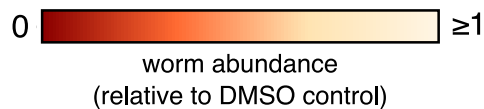

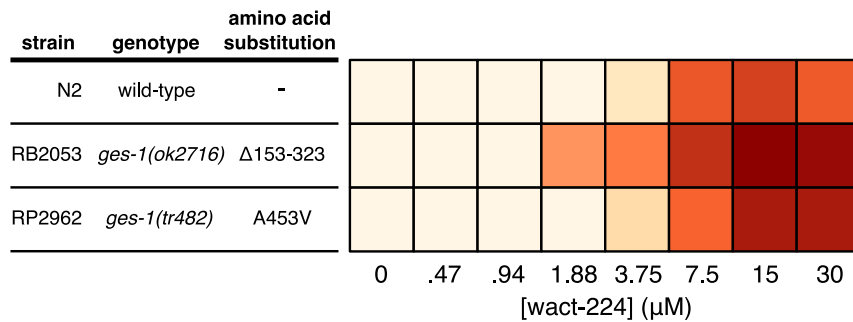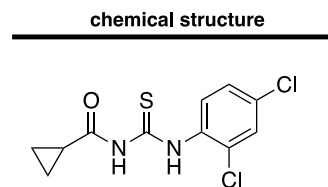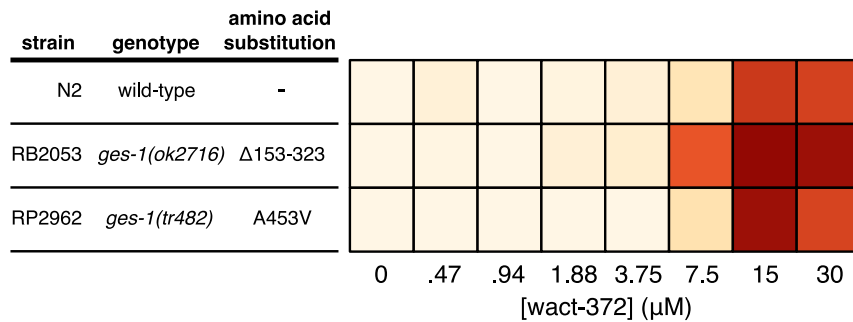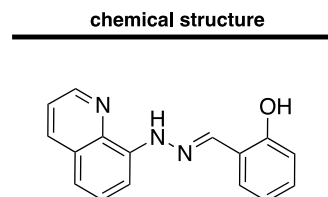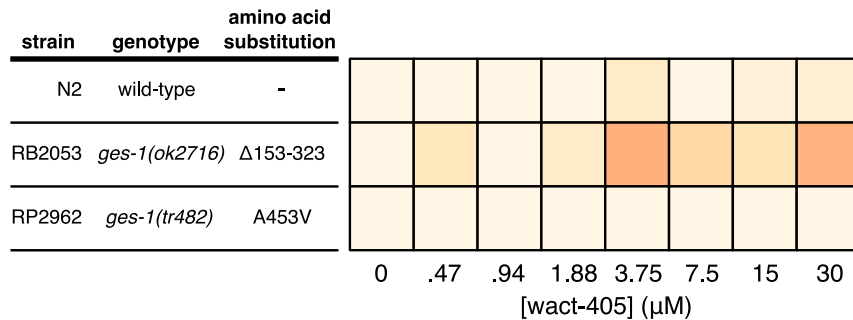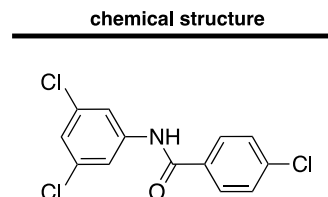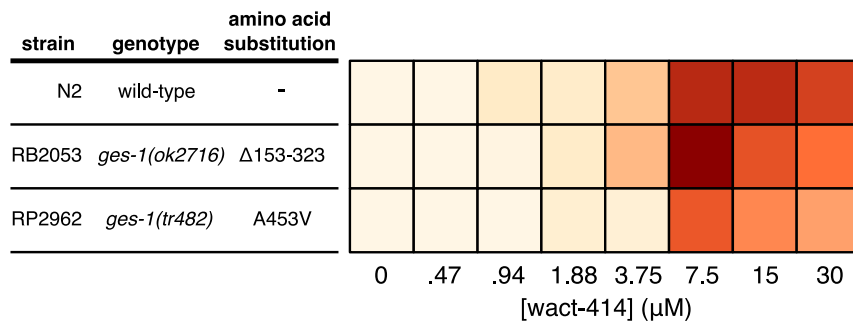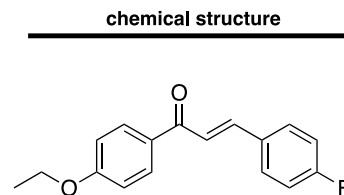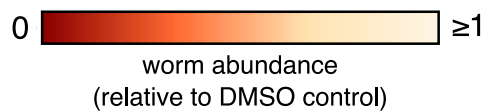

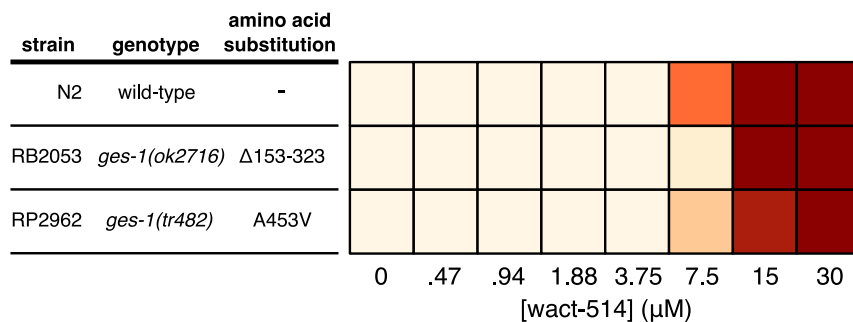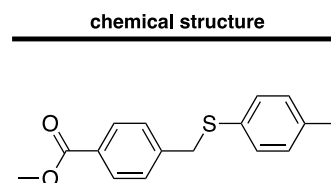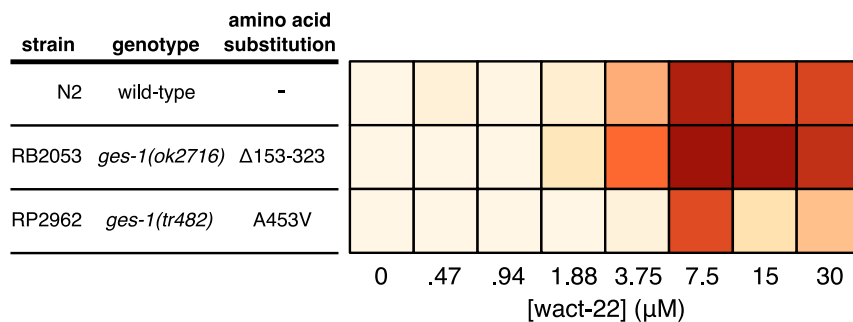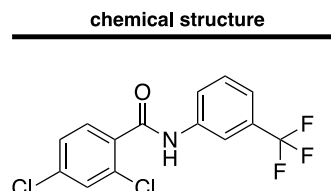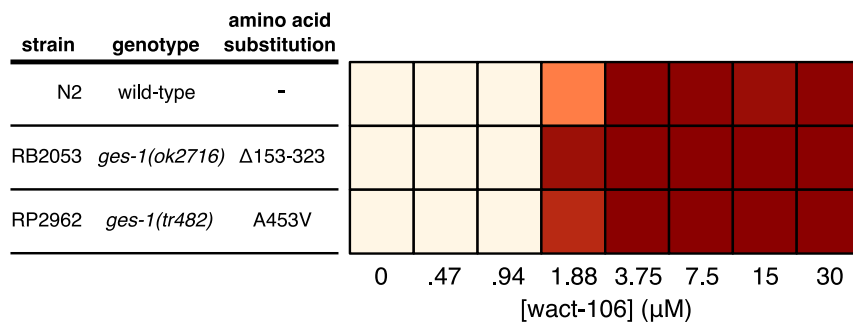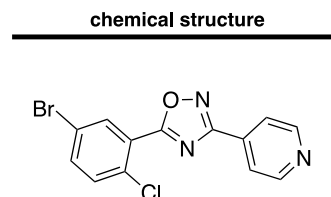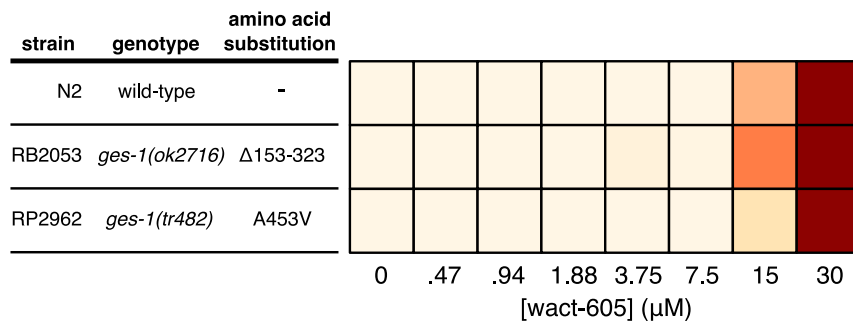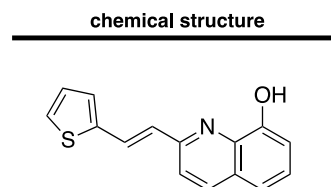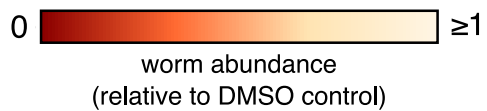

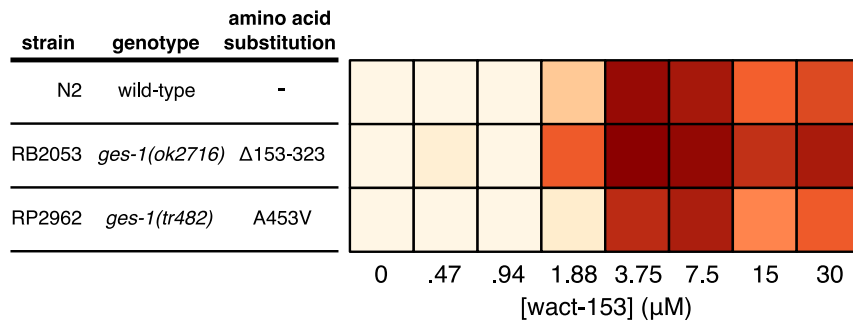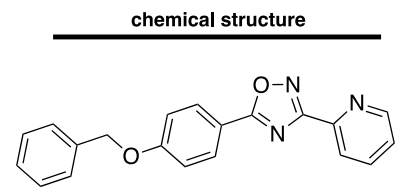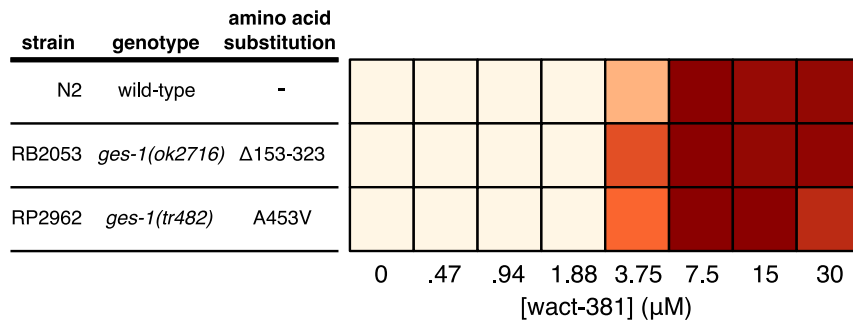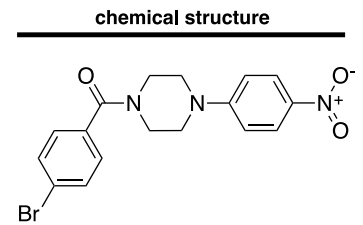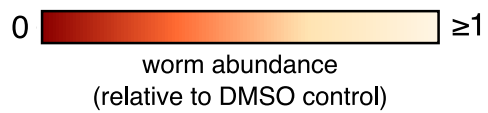

Supplement: pntd.0005502.s007.pdf [file pntd.0005502.s007.pdf]
