# Supplementary material for: The novel nematicide wact-86 interacts with aldicarb to kill nematodes
Source: PubMed Central journal article supplement (PMC5393889; doi:10.1371/journal.pntd.0005502), 2017-04-05
Supplement: pntd.0005502.s002.pdf [file pntd.0005502.s002.pdf]

| wact ID   | DMSO control replicate 1 | DMSO control replicate 2 | 10 $\mu$ M aldicarb replicate 1 | 10 $\mu$ M aldicarb replicate 2 |
|-----------|--------------------------|--------------------------|---------------------------------|---------------------------------|
| wact-86   |                          |                          |                                 |                                 |
| wact-156  |                          |                          |                                 |                                 |
| wact-390  |                          |                          |                                 |                                 |
| wact-425  |                          |                          |                                 |                                 |
| wact-446  |                          |                          |                                 |                                 |
| wact-224  |                          |                          |                                 |                                 |
| wact-372  |                          |                          |                                 |                                 |
| wact-405  |                          |                          |                                 |                                 |
| wact-414  |                          |                          |                                 |                                 |
| wact-514  |                          |                          |                                 |                                 |
| wact-22   |                          |                          |                                 |                                 |
| wact-106  |                          |                          |                                 |                                 |
| wact-605  |                          |                          |                                 |                                 |
| wact-153  |                          |                          |                                 |                                 |
| wact-381  |                          |                          |                                 |                                 |
| wact-445  |                          |                          |                                 |                                 |
| wact-632  |                          |                          |                                 |                                 |
| wact-61   |                          |                          |                                 |                                 |
| wact-393  |                          |                          |                                 |                                 |
| wact-134  |                          |                          |                                 |                                 |
| aldicarb  |                          |                          |                                 |                                 |
| aldicarb  |                          |                          |                                 |                                 |
| DMSO ctrl |                          |                          |                                 |                                 |
| DMSO ctrl |                          |                          |                                 |                                 |

 Overgrown       More than 50 worms

 10 to 50 worms       Less than 10 worms
