# Supplementary material for: The novel nematicide wact-86 interacts with aldicarb to kill nematodes
Source: PubMed Central journal article supplement (PMC5393889; doi:10.1371/journal.pntd.0005502), 2017-04-05
Supplement: pntd.0005502.s003.pdf [file pntd.0005502.s003.pdf]

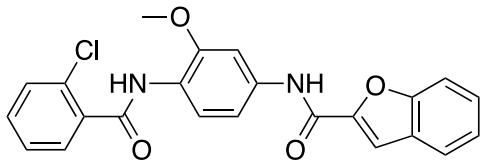

wact-86

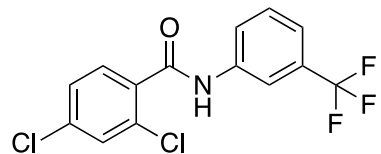

wact-22

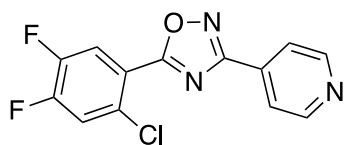

wact-156

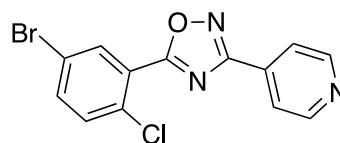

wact-106

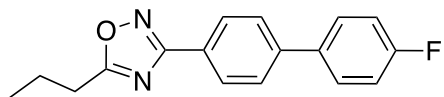

wact-390

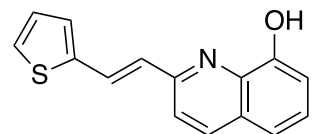

wact-605

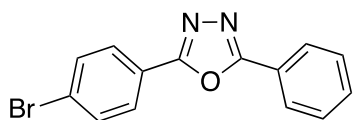

wact-425

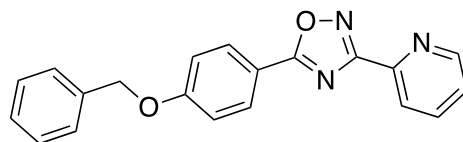

wact-153

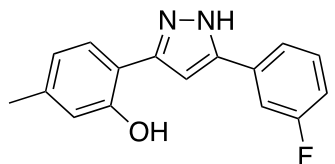

wact-446

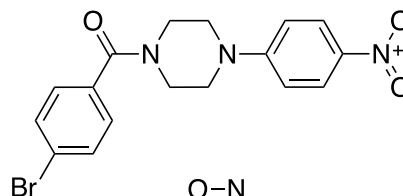

wact-381

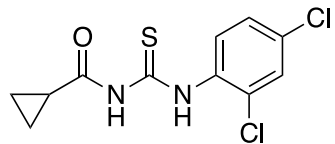

wact-224

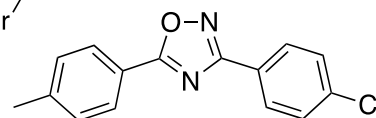

wact-445

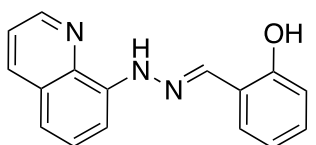

wact-372

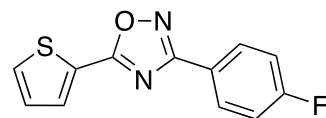

wact-632

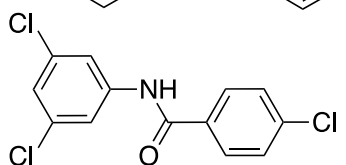

wact-405

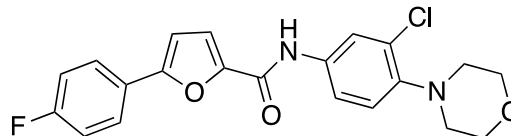

wact-61

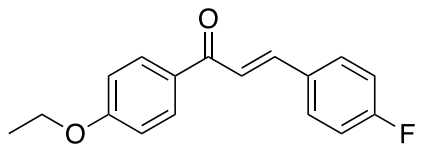

wact-414

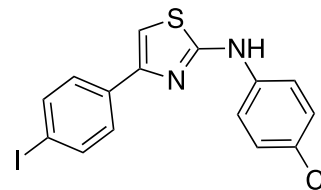

wact-393

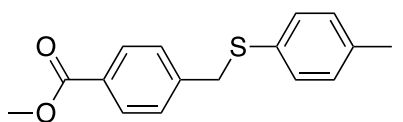

wact-514

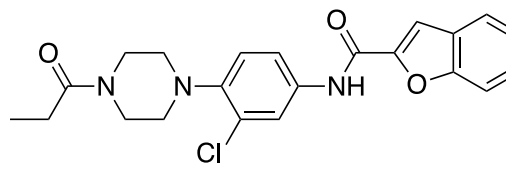

wact-134
