# Supplementary material for: The novel nematicide wact-86 interacts with aldicarb to kill nematodes
Source: PubMed Central journal article supplement (PMC5393889; doi:10.1371/journal.pntd.0005502), 2017-04-05
Supplement: pntd.0005502.s004.pdf [file pntd.0005502.s004.pdf]

**A**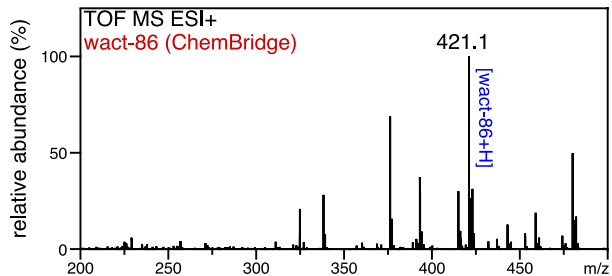**B**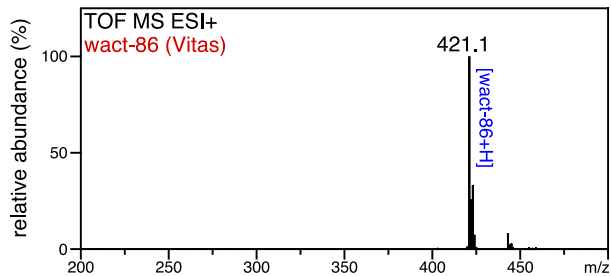**C**

| Vendor     | Target Ion Species       | Ionic Formula                                                   | Target m/z | Calculated m/z | +/- (mDa) | +/- (ppm) |
|------------|--------------------------|-----------------------------------------------------------------|------------|----------------|-----------|-----------|
| ChemBridge | [wact-86+H] <sup>+</sup> | C <sub>23</sub> H <sub>18</sub> ClN <sub>2</sub> O <sub>4</sub> | 421.0950   | 421.0950       | 0.0       | 0.0       |
| Vitas      | [wact-86+H] <sup>+</sup> | C <sub>23</sub> H <sub>18</sub> ClN <sub>2</sub> O <sub>4</sub> | 421.0957   | 421.0950       | 0.7       | 1.7       |
