# Supplementary material for: The novel nematicide wact-86 interacts with aldicarb to kill nematodes
Source: PubMed Central journal article supplement (PMC5393889; doi:10.1371/journal.pntd.0005502), 2017-04-05
Supplement: pntd.0005502.s005.pdf [file pntd.0005502.s005.pdf]

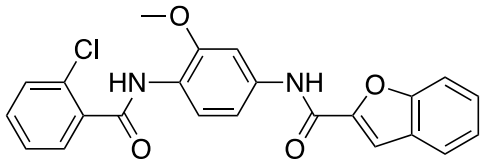

**wact-86**

CLogP = 3.304

exact mass = 420.1

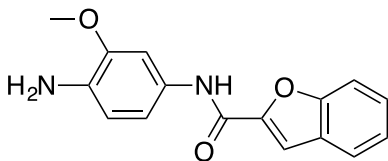

**86-M1**

CLogP = 2.299

exact mass = 282.1

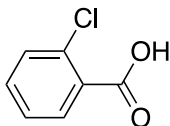

**86-M2**

CLogP = 2.096

exact mass = 156.0

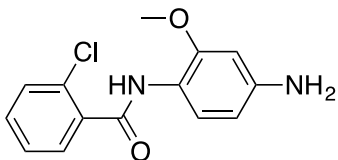

**86-M3**

CLogP = 1.023

exact mass = 276.1

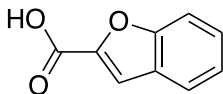

**86-M4**

CLogP = 2.445

exact mass = 162.0

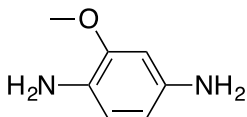

**86-M5**

CLogP = 0.008

exact mass = 138.1
