# Supplementary material for: The novel nematicide wact-86 interacts with aldicarb to kill nematodes
Source: PubMed Central journal article supplement (PMC5393889; doi:10.1371/journal.pntd.0005502), 2017-04-05
Supplement: pntd.0005502.s006.pdf [file pntd.0005502.s006.pdf]

```

GES-1_wild-type      MRIFLVSVILINACWAGPIVETNYGKVEGIEYEGAEVFLAIPFAKPPVDDLRFEKVPVAPD 60
GES-1_ok2716        MRIFLVSVILINACWAGPIVETNYGKVEGIEYEGAEVFLAIPFAKPPVDDLRFEKVPVAPD 60
GES-1_tm4694_1     MRIFLVSVILINACWAGPIVETNYGKVEGIEYEGAEVFLAIPFAKPPVDDLRFEKVPVAPD 60
GES-1_tm4694_2     MRIFLVSVILINACWAGPIVETNYGKVEGIEYEGAEVFLAIPFAKPPVDDLRFEKVPVAPD 60

GES-1_wild-type      PWEDVYPATQYRNDCTPHYRLVAQFSSYSGEDCLTLNIIKPKKAEKLPVLFWIHGGGYEI 120
GES-1_ok2716        PWEDVYPATQYRNDCTPHYRLVAQFSSYSGEDCLTLNIIKPKKAEKLPVLFWIHGGGYEI 120
GES-1_tm4694_1     PWEDVYPATQYRNDCTPHYRLVAQFSSYSGEDCLTLNIIKPKKAEKLPVLFWIHGGGYEI 120
GES-1_tm4694_2     PWEDVYPATQYRNDCTPHYRLVAQFSSYSGEDCLTLNIIKPKKAEKLPVLFWIHGGGYEI 120

GES-1_wild-type      GSASQHGHEFFAKRYASQGVIVATVQYRLGFMGFFSEGTSDVQGNWGLFDQAAALEFVKS 180
GES-1_ok2716        GSASQHGHEFFAKRYASQGVIVATVQYRLGFM----- 152
GES-1_tm4694_1     GSASQHGHEFFAKRYASQGVIVATVQYRLGFMGFFSEGTSDVQGNWGLFDQAAALEFVKS 180
GES-1_tm4694_2     GSASQHGHEFFAKRYASQGVIVATVQYRLGFMGFFSEGTSDVQGNWGLFDQAAALEFVKS 180

GES-1_wild-type      NIENFGGDPNQITIWGYSGAGAASVSQLTMSPYTRDSYSKAIIMSASSFVGWATGPNVVET 240
GES-1_ok2716        ----- 152
GES-1_tm4694_1     NIENFGGDPNQITIWGYSGAGAASVSQLTMSPYTRDSYSKAIIMSASSFVGWATGPNVVET 240
GES-1_tm4694_2     NIENFGGDPNQITIWGYSGAGAASVSQLTMSPYTRDSYSKAIIMSASSFVGWATGPNVVET 240

GES-1_wild-type      SKQLAEILGCPWPGAKECMKKKSLHEIFDAIEVQGWTGTIDILRWSPVIDGDFMTKNPE 300
GES-1_ok2716        ----- 152
GES-1_tm4694_1     SKQLAEILGCPWPGAKECMKKKSLHEIFDAIEVQGWTGTIDILRWSPVIDGDFMTKNPE 300
GES-1_tm4694_2     SKQLAEILGCPWPGAKECMKKKSLHEIFDAIEVQGWTGTIDILRWSPVIDGDFMTKNPE 300

GES-1_wild-type      ELIKESPVKPTLIGMSNKEGSYFAALNMGRVIADFGLSPEDMPKVDEEFISEIIGRKLly 360
GES-1_ok2716        -----AALNMGRVIADFGLSPEDMPKVDEEFISEIIGRKLly 189
GES-1_tm4694_1     ELIKESPVKPTLIGMSNKEGSYFAALNMGRVIADFGLSPEDMPKVDEEFISEIIGRKLly 360
GES-1_tm4694_2     ELIKESPVKPTLIGMSNKEGSYFAALNMGRVIADFGLSPEDMPKVDEEFISEIIGRKLly 360

GES-1_wild-type      NNRYGENREKVVNDILDFYVKQGKPAEVKDLNGFYVDRYSELLSDITFNVPIlREITSRV 420
GES-1_ok2716        NNRYGENREKVVNDILDFYVKQGKPAEVKDLNGFYVDRYSELLSDITFNVPIlREITSRV 249
GES-1_tm4694_1     NNRYGENREKVVNDILDFYSKOEVKFNWYSSKSLNL----- 396
GES-1_tm4694_2     NNRYGENREKVVNDILDFYASKR----- 383

GES-1_wild-type      ERKTPVWTYRMDHYDKNIWKKHIPEQARGSPHANEYHYLFDMPVMAKIDMKKEPDSWIQN 480
GES-1_ok2716        ERKTPVWTYRMDHYDKNIWKKHIPEQARGSPHANEYHYLFDMPVMAKIDMKKEPDSWIQN 309
GES-1_tm4694_1     -----GSPHANEYHYLFDMPVMAKIDMKKEPDSWIQN 428
GES-1_tm4694_2     ----- 383

GES-1_wild-type      DLIDMVISFAKTGVPQIEDVEWRPVSDPDDVNFLNIRSDGVSIEHGLFQEPPLAFWNELRQ 540
GES-1_ok2716        DLIDMVISFAKTGVPQIEDVEWRPVSDPDDVNFLNIRSDGVSIEHGLFQEPPLAFWNELRQ 369
GES-1_tm4694_1     DLIDMVISFAKTGVPQIEDVEWRPVSDPDDVNFLNIRSDGVSIEHGLFQEPPLAFWNELRQ 488
GES-1_tm4694_2     ----- 383

GES-1_wild-type      REGFDLIDPTNSAMHSSNKDEL 562
GES-1_ok2716        REGFDLIDPTNSAMHSSNKDEL 391
GES-1_tm4694_1     REGFDLIDPTNSAMHSSNKDEL 510
GES-1_tm4694_2     ----- 383

```
