# Supplementary material for: The novel nematicide wact-86 interacts with aldicarb to kill nematodes
Source: PLoS Negl Trop Dis. 2017 Apr 5;11(4):e0005502. doi: 10.1371/journal.pntd.0005502 (PMC5393889; doi:10.1371/journal.pntd.0005502)
Supplement: S1 File — (XLSX) [file pntd.0005502.s009.xlsx]

## Sheet: NOTES
	NOTES ON THE SCREENING DATA:
	1. The raw screening data can be found on the next worksheet entitled "Aldicarb Screen Raw Data"
	2. Acronyms and abbreviations:		A) OG = overgrown (i.e. the well contains adult worms, as well as hundreds of progeny, and the bacteria has been cleared from the well)
			B) L1 = first-stage larvae
			C) L2 = second-stage larvae
			D) L3 = third-stage larvae
			E) L4 = fourth-stage larvae
			F) emb = embryonic lethality observed
			G) ste = sterility observed
			H) unc = uncoordinated movement observed
			I) dpy = dumpy stature observed
	3. There are 90 DMSO control wells distributed randomly throughout the screening plates
	4. Aldicarb is found in two wells of the screening library plates, and was included in the screen for control purposes
	THE NEXT WORKSHEET CONTAINS THE RAW SCREENING DATA

## Sheet: Aldicarb Screen Raw Data 
wact ID	ID	Source	Smiles	.	DMSO control replicate 1	DMSO control replicate 2	10μM aldicarb replicate 1	10μM aldicarb replicate 2	.	Interacts with aldicarb (1 =yes)	.
wact-106	7783279	Chembridge	n1c(c2c(ccc(c2)Br)Cl)onc1c1ccncc1	.	OG	OG	11 L2s	17 L2s	.	1	.
wact-134	7985302	Chembridge	c1(oc2c(c1)cccc2)C(=O)Nc1cc(c(N2CCN(C(=O)CC)CC2)cc1)Cl	.	OG	OG	31 adults + 50 larvae + emb	30 adults + 100 larvae + emb	.	1	.
wact-153	9013537	Chembridge	n1c(noc1c1ccc(OCc2ccccc2)cc1)c1ncccc1	.	OG	OG	2 adults + 35 larvae	7 adults + 100 larvae	.	1	.
wact-156	9016428	Chembridge	n1c(c2c(cc(c(c2)F)F)Cl)onc1c1ccncc1	.	OG	OG	0 worms	2 L1s	.	1	.
wact-22	5135408	Chembridge	c1(C(=O)Nc2cc(C(F)(F)F)ccc2)c(cc(cc1)Cl)Cl	.	OG	OG	11 L2/L3	13 L3/L4	.	1	.
wact-224	7657684	Chembridge	N(C(=S)Nc1c(cc(cc1)Cl)Cl)C(=O)C1CC1	.	OG	OG	12 adults + 21 larvae	5 L4s	.	1	.
wact-372	5175205	Chembridge	c12c(N/N=C/c3c(O)cccc3)cccc2cccn1	.	OG	OG	0 worms	30 larvae	.	1	.
wact-381	5221072	Chembridge	[N+](=O)(c1ccc(N2CCN(C(=O)c3ccc(cc3)Br)CC2)cc1)[O-]	.	OG	OG	10 L1s	6 adults + 100 larvae	.	1	.
wact-390	5307019	Chembridge	n1c(noc1CCC)c1ccc(c2ccc(cc2)F)cc1	.	OG	OG	0 worms	0 worms	.	1	.
wact-393	5308491	Chembridge	n1c(scc1c1ccc(cc1)I)Nc1ccc(Cl)cc1.Br	.	OG	OG	14 adults + 100 larvae	11 adults + 100 larvae	.	1	.
wact-405	5344994	Chembridge	C(=O)(Nc1cc(cc(c1)Cl)Cl)c1ccc(cc1)Cl	.	OG	OG	11 L3/L4	2 L1s	.	1	.
wact-414	5378026	Chembridge	C(=C\c1ccc(F)cc1)/C(=O)c1ccc(cc1)OCC	.	OG	OG	2 adults + 4 larvae	13 adults + >100 larvae	.	1	.
wact-425	5570574	Chembridge	BrC1=CC=C(C=C1)C1=NN=C(O1)C1=CC=CC=C1	.	OG	OG	6 L1s	0 worms	.	1	.
wact-445	5923938	Chembridge	n1c(noc1c1ccc(cc1)C)c1ccc(cc1)Cl	.	OG	OG	8 adults + 15 larvae	10 adults + 100 larvae	.	1	.
wact-446	5962739	Chembridge	c1(n[nH]c(c1)c1cc(F)ccc1)c1c(cc(cc1)C)O	.	OG	OG	0 worms	0 worms	.	1	.
wact-514	7649812	Chembridge	C(=O)(c1ccc(CSc2ccc(cc2)C)cc1)OC	.	OG	OG	3 L3s	2 adults + 30 larvae	.	1	.
wact-605	7631098	Chembridge	n1c2c(O)cccc2ccc1/C=C/c1sccc1	.	OG	OG	30 larvae	28 larvae	.	1	.
wact-61	6251043	Chembridge	c1(oc(cc1)c1ccc(cc1)F)C(=O)Nc1cc(c(N2CCOCC2)cc1)Cl	.	OG	OG	15 adults + 100 larvae + emb	OG + emb, fewer worms	.	1	.
wact-632	9021292	Chembridge	n1c(onc1c1ccc(cc1)F)c1sccc1	.	OG	OG	9 adults + 20 larvae	18 adults + >100 larvae	.	1	.
wact-86	7640928	Chembridge	c1(oc2c(c1)cccc2)C(=O)Nc1cc(c(NC(=O)c2c(Cl)cccc2)cc1)OC	.	OG	OG	4 L2s	3 L2s	.	1	.
aldicarb	33386	Sigma	O=C(O\N=C\C(SC)(C)C)NC	.	OG	OG	OG	OG	.	0	.
aldicarb	33386	Sigma	O=C(O\N=C\C(SC)(C)C)NC	.	OG	OG	OG	OG	.	0	.
clearyn	T6193922	Enamine	CC1CCC2=C(C1)C=C(S2)C1=NN=C(O1)SCC(=O)NCC#C		OG	OG	OG	OG		0
dafadine-A	24199950	Chembridge	c1(noc(c1)COc1c(cccc1C)C)C(=O)N1CCC(CC1)c1ccncc1		OG	OG	OG	OG		0
dafadine-B	40139765	Chembridge	O=C(N1CCC(C2=CC=NC=C2)CC1)C3=NOC(COC4=CC=C(F)C=C4Cl)=C3		OG	OG	OG	OG		0
DMSO	DMSO	-		.	OG	OG	OG	OG	.	0	.
DMSO	DMSO	-		.	OG	OG	OG	OG	.	0	.
DMSO	DMSO	-		.	OG	OG	OG	OG	.	0	.
DMSO	DMSO	-		.	OG	OG	OG	OG	.	0	.
DMSO	DMSO	-		.	OG	OG	OG	OG	.	0	.
DMSO	DMSO	-		.	OG	OG	OG	OG	.	0	.
DMSO	DMSO	-		.	OG	OG	OG	OG	.	0	.
DMSO	DMSO	-		.	OG	OG	OG	OG	.	0	.
DMSO	DMSO	-		.	OG	OG	OG	OG	.	0	.
DMSO	DMSO	-		.	OG	OG	OG	OG	.	0	.
DMSO	DMSO	-		.	OG	OG	OG	OG	.	0	.
DMSO	DMSO	-		.	OG	OG	OG	OG	.	0	.
DMSO	DMSO	-		.	OG	OG	OG	OG	.	0	.
DMSO	DMSO	-		.	OG	OG	OG	OG	.	0	.
DMSO	DMSO	-		.	OG	OG	OG	OG	.	0	.
DMSO	DMSO	-		.	OG	OG	OG	OG	.	0	.
DMSO	DMSO	-		.	OG	OG	OG	OG	.	0	.
DMSO	DMSO	-		.	OG	OG	OG	OG	.	0	.
DMSO	DMSO	-		.	OG	OG	OG	OG	.	0	.
DMSO	DMSO	-		.	OG	OG	OG	OG	.	0	.
DMSO	DMSO	-		.	OG	OG	OG	OG	.	0	.
DMSO	DMSO	-		.	OG	OG	OG	OG	.	0	.
DMSO	DMSO	-		.	OG	OG	OG	OG	.	0	.
DMSO	DMSO	-		.	OG	OG	OG	OG	.	0	.
DMSO	DMSO	-		.	OG	OG	OG	OG	.	0	.
DMSO	DMSO	-		.	OG	OG	OG	OG	.	0	.
DMSO	DMSO	-		.	OG	OG	OG	OG	.	0	.
DMSO	DMSO	-		.	OG	OG	OG	OG	.	0	.
DMSO	DMSO	-		.	OG	OG	OG	OG	.	0	.
DMSO	DMSO	-		.	OG	OG	OG	OG	.	0	.
DMSO	DMSO	-		.	OG	OG	OG	OG	.	0	.
DMSO	DMSO	-		.	OG	OG	OG	OG	.	0	.
DMSO	DMSO	-		.	OG	OG	OG	OG	.	0	.
DMSO	DMSO	-		.	OG	OG	OG	OG	.	0	.
DMSO	DMSO	-		.	OG	OG	OG	OG	.	0	.
DMSO	DMSO	-		.	OG	OG	OG	OG	.	0	.
DMSO	DMSO	-		.	OG	OG	OG	OG	.	0	.
DMSO	DMSO	-		.	OG	OG	OG	OG	.	0	.
DMSO	DMSO	-		.	OG	OG	OG	OG	.	0	.
DMSO	DMSO	-		.	OG	OG	OG	OG	.	0	.
DMSO	DMSO	-		.	OG	OG	OG	OG	.	0	.
DMSO	DMSO	-		.	OG	OG	OG	OG	.	0	.
DMSO	DMSO	-		.	OG	OG	OG	OG	.	0	.
DMSO	DMSO	-		.	OG	OG	OG	OG	.	0	.
DMSO	DMSO	-		.	OG	OG	OG	OG	.	0	.
DMSO	DMSO	-		.	OG	OG	OG	OG	.	0	.
DMSO	DMSO	-		.	OG	OG	OG	OG	.	0	.
DMSO	DMSO	-		.	OG	OG	OG	OG	.	0	.
DMSO	DMSO	-		.	OG	OG	OG	OG	.	0	.
DMSO	DMSO	-		.	OG	OG	OG	OG	.	0	.
DMSO	DMSO	-		.	OG	OG	OG	OG	.	0	.
DMSO	DMSO	-		.	OG	OG	OG	OG	.	0	.
DMSO	DMSO	-		.	OG	OG	OG	OG	.	0	.
DMSO	DMSO	-		.	OG	OG	OG	OG	.	0	.
DMSO	DMSO	-		.	OG	OG	OG	OG	.	0	.
DMSO	DMSO	-		.	OG	OG	OG	OG	.	0	.
DMSO	DMSO	-		.	OG	OG	OG	OG	.	0	.
DMSO	DMSO	-		.	OG	OG	OG	OG	.	0	.
DMSO	DMSO	-		.	OG	OG	OG	OG	.	0	.
DMSO	DMSO	-		.	OG	OG	OG	OG	.	0	.
DMSO	DMSO	-		.	OG	OG	OG	OG	.	0	.
DMSO	DMSO	-		.	OG	OG	OG	OG	.	0	.
DMSO	DMSO	-		.	OG	OG	OG	OG	.	0	.
DMSO	DMSO	-		.	OG	OG	OG	OG	.	0	.
DMSO	DMSO	-		.	OG	OG	OG	OG	.	0	.
DMSO	DMSO	-		.	OG	OG	OG	OG	.	0	.
DMSO	DMSO	-		.	OG	OG	OG	OG	.	0	.
DMSO	DMSO	-		.	OG	OG	OG	OG	.	0	.
DMSO	DMSO	-		.	OG	OG	OG	OG	.	0	.
DMSO	DMSO	-		.	OG	OG	OG	OG	.	0	.
DMSO	DMSO	-		.	OG	OG	OG	OG	.	0	.
DMSO	DMSO	-		.	OG	OG	OG	OG	.	0	.
DMSO	DMSO	-		.	OG	OG	OG	OG	.	0	.
DMSO	DMSO	-		.	OG	OG	OG	OG	.	0	.
DMSO	DMSO	-		.	OG	OG	OG	OG	.	0	.
DMSO	DMSO	-		.	OG	OG	OG	OG	.	0	.
DMSO	DMSO	-		.	OG	OG	OG	OG	.	0	.
DMSO	DMSO	-		.	OG	OG	OG	OG	.	0	.
DMSO	DMSO	-		.	OG	OG	OG	OG	.	0	.
DMSO	DMSO	-		.	OG	OG	OG	OG	.	0	.
DMSO	DMSO	-		.	OG	OG	OG	OG	.	0	.
DMSO	DMSO	-		.	OG	OG	OG	OG	.	0	.
DMSO	DMSO	-		.	OG	OG	OG	OG	.	0	.
DMSO	DMSO	-		.	OG	OG	OG	OG	.	0	.
DMSO	DMSO	-		.	OG	OG	OG	OG	.	0	.
DMSO	DMSO	-		.	OG	OG	OG	OG	.	0	.
DMSO	DMSO	-		.	OG	OG	OG	OG	.	0	.
DMSO	DMSO	-		.	OG	OG	OG	OG	.	0	.
DMSO	DMSO	-		.	OG	OG	OG	OG	.	0	.
DMSO	DMSO	-		.	OG	OG	OG	OG	.	0	.
emb-b	5610929	Chembridge	[N+](=O)(c1cc(c(cc1)NCCNC(=O)c1ccc(cc1)F)Cl)[O-]	.	OG	OG	OG	OG	.	0	.
emb-q	BTB 05020	Maybridge	c1(n[nH]c(c1)c1ccc(n2cccc2)cc1)C(F)(F)F	.	OG	OG	OG	OG	.	0	.
emb-u	C 9911	Maybridge	O=C1[C@](O)(CC)C(C=C2C3=NC4=CC=CC=C4C=C3CN2C5=O)=C5CO1		OG	OG	OG	OG		0
embrazole-x	57022638	Chembridge	FC1=CC=CC(CNC(=O)C2=NOC(COC3=CC=C(C=C3)N3C=NC=N3)=C2)=C1		42 adults + 0 larvae + lots emb	44 adults + 0 larvae + lots emb	35 adults + 0 larvae + lots emb	42 adults + 0 larvae + lots emb		0
HBAC-A	T5641850	Enamine	O=C(NC1=NC2=C(C=CC=C2)C=C1)C1=CC(=CC=C1)S(=O)(=O)NCC#C		OG	OG	OG	OG		0
HBAC-B	HTS05482	Ryan Scientific	O=C(C1=CC=CC=C1)NC2=NC3=C(C=C2)C=CC=C3		OG	OG	OG	OG		0
mezole-1	5784184	Chembridge	O=C(N\N=C\C1=CC=NC=C1)C1=NNC2=C1CCCC2	.	OG	OG	OG	OG	.	0	.
migrazole-A	DP 01417	Maybridge	C1=CC(=CC=C1C(=O)O/N=C(/C2=C(C=C(C=C2)F)F)\N)Cl	.	OG	OG	OG	OG	.	0	.
wact-1	5121613	Chembridge	c12nc(cn1ccs2)c1ccc(cc1)Cl	.	OG	OG	OG	OG	.	0	.
wact-10	5905384	Chembridge	n1c(noc1c1ccc(cc1)CCC)c1cnccc1	.	OG	OG	OG	OG	.	0	.
wact-100	7747140	Chembridge	N(=C(\c1ccncc1)/N)/OC(=O)c1c(cc(cc1)C)C	.	OG	OG	OG	OG	.	0	.
wact-101	7747622	Chembridge	N1(C(=O)c2ccc(cc2)c2ccccc2)CC(CC1)c1ccccc1	.	OG	OG	OG	OG	.	0	.
wact-102	7747740	Chembridge	O(c1ccc(cc1)OC)Cc1ccc(Cl)cc1	.	OG	OG	OG	OG	.	0	.
wact-103	7756678	Chembridge	C(=O)(c1sccc1)Nc1cc(c(N2CCN(CC2)CC)cc1)Cl	.	OG	OG	OG	OG	.	0	.
wact-104	7780917	Chembridge	C(=O)(O/N=C(/c1ccncc1)\N)C(Oc1ccc(Br)cc1)C	.	OG	OG	OG	OG	.	0	.
wact-105	7782912	Chembridge	c1(C(=O)O/N=C(/c2ccncc2)\N)c(ccc(c1)Br)Cl	.	OG	OG	OG	OG	.	0	.
wact-107	7785818	Chembridge	C(=S)(Nc1cc(c(cc1)Cl)Cl)NC1CCN(Cc2ccccc2)CC1	.	OG	OG	OG	OG	.	0	.
wact-108	7788232	Chembridge	C(=S)(NC1CCN(Cc2ccccc2)CC1)NCc1ccc(Cl)cc1	.	OG	OG	OG	OG	.	0	.
wact-109	7795345	Chembridge	[N+](=O)(c1ccc(NC(=S)NCc2cc(c(cc2)Cl)Cl)cc1)[O-]	.	OG	OG	OG	OG	.	0	.
wact-11	6222549	Chembridge	C(c1c(C(=O)NCCc2ccc(Cl)cc2)cccc1)(F)(F)F	.	36 adults + 0 larvae + 0 eggs - STE	28 adults + 0 larvae + 0 eggs - STE	27 adults + 0 larvae + 0 eggs	35 adults + 0 larvae + 0 eggs	.	0	.
wact-110	7796788	Chembridge	C(=O)(Nc1cc(c(cc1)Cl)Cl)NC1CCN(Cc2ccccc2)CC1	.	OG	OG	OG	OG	.	0	.
wact-111	7805914	Chembridge	C(=S)(N1CCN(c2cc(c(cc2)Cl)Cl)CC1)NCC1OCCC1	.	OG	OG	OG	OG	.	0	.
wact-112	7831354	Chembridge	C(c1cc(NC(=O)Nc2ccc(OC(F)F)cc2)ccc1)(F)(F)F	.	OG	OG	OG	OG	.	0	.
wact-113	7834045	Chembridge	n1c(onc1c1ccc(cc1)Br)c1occc1	.	0 worms	0 worms	0 worms	0 worms	.	0	.
wact-114	7837303	Chembridge	n1(ncc(c1)NC(=S)NCc1ccc(F)cc1)Cc1ccc(Br)cc1	.	OG	OG	OG	OG	.	0	.
wact-115	7839427	Chembridge	[N+](=O)(c1ccc(N2CCN(C(=S)NCc3ccc(Cl)cc3)CC2)cc1)[O-]	.	OG	OG	OG	OG	.	0	.
wact-116	7841535	Chembridge	C(=O)(N1CCN(c2c3c(cc(cc3)Cl)ncc2)CC1)c1cc(Br)ccc1	.	OG	OG	OG	OG	.	0	.
wact-117	7854576	Chembridge	[N+](=O)(c1cc(C(F)(F)F)ccc1NCCCNC(=O)c1ccc(cc1)F)[O-]	.	OG + emb	OG + emb	41 adults + 7 larvae + emb	34 adlts + 2 larvae + emb	.	0	.
wact-118	7862504	Chembridge	s1c(ccc1)CNCc1cc(OCc2ccccc2)ccc1.Cl	.	OG	OG	OG	OG	.	0	.
wact-119	7884485	Chembridge	s1c(ccc1)CNCc1ccc(OCc2ccccc2)cc1.Cl	.	OG	OG	OG	OG	.	0	.
wact-12	7003409	Chembridge	c1(C(=O)NCCOc2ccc(cc2)CC)c(I)cccc1	.	OG	OG	OG	OG	.	0	.
wact-120	7889289	Chembridge	C(=O)(Nc1ccc(c2ccccc2)cc1)OC	.	OG	OG	OG	OG	.	0	.
wact-121	7889470	Chembridge	c1(ncccn1)SCC#CCOc1ccc(Cl)cc1	.	OG	OG	OG	OG	.	0	.
wact-122	7930372	Chembridge	c1([N+](=O)[O-])c(cc(N2Cc3c(CC2)cccc3)c(c1)F)N1CCN(C(=O)C)CC1	.	OG	OG	OG	OG	.	0	.
wact-123	7938805	Chembridge	c1(sc2c(c1Cl)ccc(c2)Cl)C(=O)NCC1CC1	.	OG	OG	OG	OG	.	0	.
wact-124	7943845	Chembridge	N1(C(=O)CCCc2ccccc2)CCN(c2ccc(cc2)Cl)CC1	.	OG	OG	OG	OG	.	0	.
wact-125	7949759	Chembridge	c1(C(=O)NCCSC2CCCCC2)c(SC)cccc1	.	OG	OG	OG	OG	.	0	.
wact-126	7957874	Chembridge	n1c(nsc1N)SC(c1ccc(cc1)Cl)c1ccccc1	.	OG	OG	OG	OG	.	0	.
wact-127	7962412	Chembridge	c1(C(=O)NCCCCC)c(SC)cccc1	.	OG	OG	OG	OG	.	0	.
wact-128	7971816	Chembridge	c1(C(=O)Nc2ccc(Br)cc2)c(cc(cc1)F)F	.	OG	OG	OG	OG	.	0	.
wact-129	7972200	Chembridge	c1(c(cc(cc1Cl)CN)Cl)OCc1ccccc1.Cl	.	OG	OG	OG	OG	.	0	.
wact-13	7632721	Chembridge	n1c(noc1c1cc(ccc1)C)c1ccc(cc1)OC	.	OG	OG	OG	OG	.	0	.
wact-130	7974202	Chembridge	n1c(oc2c1cc(N)cc2)c1ccc(cc1)C(C)C	.	OG	OG	OG	OG	.	0	.
wact-131	7978444	Chembridge	n1c(onc1c1ccccc1)c1c(C)cccc1	.	OG	OG	OG	OG	.	0	.
wact-132	7983837	Chembridge	S(=O)(=O)(c1cc(c(cc1Cl)OCC)Cl)NCc1ccncc1	.	OG	OG	OG	OG	.	0	.
wact-133	7985186	Chembridge	n1c(onc1c1ccc(C(C)(C)C)cc1)c1cnccc1	.	OG	OG	OG	OG	.	0	.
wact-135	7986793	Chembridge	n1c(noc1c1ccccc1)c1cc(OC)ccc1	.	OG	OG	OG	OG	.	0	.
wact-136	7989399	Chembridge	n1c(onc1c1cc(OC)ccc1)c1sccc1	.	OG	OG	OG	OG	.	0	.
wact-137	7996054	Chembridge	n1c(oc2c1nccc2)c1cc(c(NC(=O)c2cc(Cl)ccc2)cc1)C	.	OG	OG	OG	OG	.	0	.
wact-138	7999607	Chembridge	c12c(n(c(n1)N1CCN(c3cc(Cl)ccc3)CC1)CC(=C)C)c(=O)[nH]c(=O)n2C	.	OG	OG	OG	OG	.	0	.
wact-139	9000613	Chembridge	n1c(onc1c1cc(Br)ccc1)c1occc1	.	25 adults + ~200 larvae	16 adults + ~100 larvae	2 larvae	6 L3	.	0	.
wact-14	7635413	Chembridge	n1c(noc1CSc1ccccc1)c1ccc(cc1)Cl	.	OG	OG	OG	OG	.	0	.
wact-140	9001112	Chembridge	n1(c2c(c(ncn2)SC(C)C)cn1)c1ccccc1	.	OG	OG	OG	OG	.	0	.
wact-141	9003606	Chembridge	C(=O)(Nc1ccc(Cl)cc1)Cc1cc(F)ccc1	.	OG	OG	OG	OG	.	0	.
wact-142	9003697	Chembridge	n1(c2c(cn1)c(ncn2)SCC)c1ccccc1	.	OG	OG	OG	OG	.	0	.
wact-143	9008780	Chembridge	c1(c(c(cc(c1)Cl)C)OCCCN1CCN(CC1)C)Br.Cl	.	OG	OG	OG	OG	.	0	.
wact-144	9009342	Chembridge	c1(c(ccc(c1)I)OCCCN(C)C)C.Cl	.	OG	OG	OG	OG	.	0	.
wact-145	9010179	Chembridge	C(c1cc(c(NC(=O)c2sccc2)cc1)Cl)(F)(F)F	.	OG	OG	OG	OG	.	0	.
wact-146	9010643	Chembridge	N1(CCCCOc2ccc(c3ccccc3)cc2)CCOCC1.Cl	.	OG	OG	OG	OG	.	0	.
wact-147	9011168	Chembridge	c1(c2ccccc2)ccc(cc1)OCCNCC=C.Cl	.	OG	OG	OG	OG	.	0	.
wact-148	9011314	Chembridge	c1(c2c(ccc1OCCCn1cncc1)cccc2)Cl.Cl	.	OG	OG	OG	OG	.	0	.
wact-149	9011725	Chembridge	c1(c(ccc(c1)Br)OCCCN1CCN(CC1)C)C(C)C.Cl	.	OG	OG	OG	OG	.	0	.
wact-15	7687977	Chembridge	n1c(sc2c1cccc2)COc1ccc(F)cc1	.	OG	OG	OG	OG	.	0	.
wact-150	9012025	Chembridge	N1(c2c(cc(NC(=O)c3ccc(cc3)CC)cc2)Cl)CCN(CC1)C	.	OG	OG	OG	OG	.	0	.
wact-151	9012797	Chembridge	N1(CCCOc2ccc(c3ccccc3)cc2)CCOCC1.Cl	.	OG	OG	OG	OG	.	0	.
wact-152	9012891	Chembridge	c1(c2ccccc2)ccc(cc1)OCCCN(C)C.Cl	.	OG	OG	OG	OG	.	0	.
wact-154	9013615	Chembridge	n1c(noc1c1ccc(OCc2ccccc2)cc1)c1cnccc1	.	0 worms	0 worms	0 worms	0 worms	.	0	.
wact-155	9014681	Chembridge	C(c1cc(OCCCCn2cncc2)ccc1)(F)(F)F.Cl	.	OG	OG	OG	OG	.	0	.
wact-157	9017046	Chembridge	n1c(onc1c1ccc(NC(=O)c2cc(Cl)ccc2)cc1)c1cnccc1	.	0 worms	0 worms	7 L1s	17 L2/L3	.	0	.
wact-158	9017109	Chembridge	n1c(noc1c1ccc(cc1)F)c1cc(Br)ccc1	.	0 worms	0 worms	0 worms	12 L2s	.	0	.
wact-159	9017143	Chembridge	n1c(noc1c1sccc1)c1sccc1	.	OG	OG	OG	OG	.	0	.
wact-16	7721223	Chembridge	c1(ncccn1)SCCOc1ccc(I)cc1	.	OG	OG	OG	OG	.	0	.
wact-160	9017218	Chembridge	C(=O)(C1CCN(CC1)CCOc1c(cc(cc1)Cl)C)OCC.Cl	.	OG	OG	OG	OG	.	0	.
wact-161	9017369	Chembridge	n1c(nc(nc1Nc1ccc(Cl)cc1)N)C(F)(F)F	.	OG	OG	OG	OG	.	0	.
wact-162	9018123	Chembridge	N(C(=O)c1occc1)(C(=O)c1occc1)c1ncc(cc1)I	.	OG	OG	OG	OG	.	0	.
wact-163	9018909	Chembridge	c12c(c(ccc1Cl)OCCNCC)cccc2.Cl	.	OG	OG	OG	OG	.	0	.
wact-164	9020008	Chembridge	O(c1ccc(cc1)CNC)Cc1ccc(Cl)cc1.Cl	.	OG	OG	OG	OG	.	0	.
wact-165	9020086	Chembridge	n1c(onc1c1ccc(cc1)F)c1occc1	.	OG	OG	OG	OG	.	0	.
wact-166	9023097	Chembridge	S(=O)(=O)(NCc1ccncc1)c1ccc(cc1)C1CCCCC1	.	0 worms	0 worms	0 worms	5 L1s	.	0	.
wact-167	9023309	Chembridge	c1(nc(on1)/C=C/c1ccccc1)c1sccc1	.	0 worms	0 worms	0 worms	0 worms	.	0	.
wact-168	9023420	Chembridge	c12c(c3c(n1CCN1CCCCC1)ccc(c3)OC)nc(s2)C.Cl	.	OG	OG	OG	OG	.	0	.
wact-169	9024879	Chembridge	n1c(noc1c1c(cc(cc1)Cl)Cl)c1sccc1	.	OG	OG	1 adult + 2 larvae	OG	.	0	.
wact-17	5100784	Chembridge	C(=C\c1c(F)cccc1)/C(=O)c1ccc(cc1)OCC	.	OG	OG	OG	OG	.	0	.
wact-170	9025087	Chembridge	n1c(noc1c1ccncc1)c1ccc(NC(=O)c2cc(Cl)ccc2)cc1	.	0 worms	0 worms	16 L1s	8 L1s	.	0	.
wact-171	9025218	Chembridge	n1c(noc1/C=C/c1ccccc1)c1ccc(NC(=O)c2c(F)cccc2)cc1	.	0 worms	0 worms	0 worms	5 L1s	.	0	.
wact-172	9025332	Chembridge	O(c1cc(CNC)ccc1)Cc1ccc(Cl)cc1.Cl	.	OG	OG	OG	OG	.	0	.
wact-173	9026581	Chembridge	C(=O)(Nc1cc(c(N2CCN(CC2)C)cc1)Cl)c1cc2c(OCCO2)cc1	.	OG	OG	OG	OG	.	0	.
wact-174	9026631	Chembridge	n1c(noc1c1ccncc1)c1ccc(NC(=O)c2c(F)cccc2)cc1	.	0 worms	0 worms	0 worms	0 worms	.	0	.
wact-175	9027529	Chembridge	n1c(noc1c1occc1)c1sccc1	.	OG	OG	OG	OG	.	0	.
wact-176	9029633	Chembridge	n1c(onc1c1cc(C(F)(F)F)ccc1)c1ncccc1	.	OG	OG	OG	OG	.	0	.
wact-177	9030024	Chembridge	c1(nc(no1)c1ccccc1)c1c(F)cccc1F	.	OG	OG	OG	OG	.	0	.
wact-178	9030418	Chembridge	n1c(c2c(I)cccc2)onc1c1ccccc1	.	OG	OG	OG	OG	.	0	.
wact-179	9030539	Chembridge	c1(c2ccccc2)ccc(cc1)OCCNCC.Cl	.	OG	OG	OG	OG	.	0	.
wact-18	5102420	Chembridge	N(=C(\c1sccc1)/C)/N=C(/c1sccc1)\C	.	OG	OG	OG	OG	.	0	.
wact-180	9031277	Chembridge	n1c(onc1c1cc(C(F)(F)F)ccc1)c1sccc1	.	OG	OG	OG	OG	.	0	.
wact-181	9032631	Chembridge	n1c(cnc2c1cccc2)c1ccc(cc1)C	.	OG	OG	OG	OG	.	0	.
wact-182	9033974	Chembridge	c1(oc(cc1)CNC1CC1)c1cc(c(cc1)F)Cl	.	OG	OG	OG	OG	.	0	.
wact-183	9034414	Chembridge	c1(oc(cc1)CNC)c1c(c(Cl)ccc1)C.Cl	.	OG	OG	OG	OG	.	0	.
wact-184	9034543	Chembridge	n1c(noc1c1ccccc1)c1ccc(cc1)Br	.	OG	OG	OG	OG	.	0	.
wact-185	9034820	Chembridge	n1c(onc1c1ccc(cc1)Cl)C(Oc1ccccc1)C	.	OG	OG	OG	OG	.	0	.
wact-186	9034924	Chembridge	c1(oc(cc1)CNCC)c1cc(c(cc1)F)Cl.Cl	.	OG	OG	OG	OG	.	0	.
wact-187	9035461	Chembridge	c1(oc(cc1)CNCC=C)c1ccc(cc1)Cl.Cl	.	OG	OG	OG	OG	.	0	.
wact-188	9035603	Chembridge	c1(oc(cc1)CNCc1sccc1)c1c(F)cccc1.Cl	.	OG	OG	OG	OG	.	0	.
wact-189	9036508	Chembridge	c1(cc(ncn1)c1ccccc1)N(Cc1ccccc1)C	.	OG	OG	OG	OG	.	0	.
wact-19	5104063	Chembridge	c12c(SCCc3ccncc3)cccc1cccc2	.	OG	OG	OG	OG	.	0	.
wact-190	9036812	Chembridge	n1c(noc1c1ccncc1)c1ccc(OCc2ccccc2)cc1	.	0 worms	0 worms	0 worms	4 L1s	.	0	.
wact-191	9037311	Chembridge	n1c(noc1c1cc(F)ccc1)c1ccccc1	.	OG	OG	OG	OG	.	0	.
wact-192	9038241	Chembridge	c1(oc(cc1)CNC)c1ccc(cc1)Br.Cl	.	OG	OG	OG	OG	.	0	.
wact-193	9038739	Chembridge	C(=O)(Nc1cc(c(cc1)F)F)Nc1cc(c(cc1)F)F	.	OG	OG	OG	OG	.	0	.
wact-194	9040417	Chembridge	c1(oc(cc1)CNC1CC1)c1ccc(cc1)Cl.Cl	.	OG	OG	OG	OG	.	0	.
wact-195	9040512	Chembridge	n1c(onc1c1ccc(OCc2ccccc2)cc1)c1cnccc1	.	0 worms	0 worms	0 worms	0 worms	.	0	.
wact-196	9041035	Chembridge	c1(oc(cc1)CNC)c1cc(cc(c1)Cl)Cl	.	OG	OG	OG	OG	.	0	.
wact-197	9041446	Chembridge	c1c(ncnc1SC)c1ccccc1	.	OG	OG	OG	OG	.	0	.
wact-198	9046593	Chembridge	c1(C(=O)Nc2cc(C(F)(F)F)c(cc2)Cl)n(ncc1)C	.	OG	OG	OG	OG	.	0	.
wact-199	9049306	Chembridge	C(=O)(N1CCN(CC1)CC)Nc1cc(cc(c1)Cl)Cl	.	OG	OG	OG	OG	.	0	.
wact-2	5185411	Chembridge	n1c(onc1c1ccc(cc1)Br)c1sccc1	.	0 worms	0 worms	0 worms	0 worms	.	0	.
wact-20	5104389	Chembridge	C(=C\c1ccc(cc1)OCC)/C(=O)c1ccc(cc1)OC	.	OG	OG	OG	OG	.	0	.
wact-200	9053402	Chembridge	C(=O)(N1CCN(CC1)CCC)Nc1cc(cc(c1)Cl)Cl	.	OG	OG	OG	OG	.	0	.
wact-201	9059099	Chembridge	n1c(onc1c1ccccc1)C(=O)NCc1cc(C(F)(F)F)ccc1	.	OG	OG	OG	OG	.	0	.
wact-202	9061169	Chembridge	c1(oc(cc1)CNCC)c1c(cc(cc1)Br)C.Cl	.	OG	OG	OG	OG	.	0	.
wact-203	9062286	Chembridge	n1c(c2sccc2)csc1c1occc1	.	OG	OG	OG	OG	.	0	.
wact-204	9063096	Chembridge	C1(CC1)NCc1ccc(OCc2ccc(Cl)cc2)cc1.Cl	.	OG	OG	OG	OG	.	0	.
wact-205	9067742	Chembridge	n1c(oc2c1nccc2)c1ccc(NCc2ncccc2)cc1	.	OG	OG	OG	OG	.	0	.
wact-206	5809731	Chembridge	ClC1=C(SC2=CC=CC=C12)C(=O)N1C(SCC#C)=NC2=CC=CC=C12	.	OG	OG	0 worms	OG	.	0	.
wact-207	6859543	Chembridge	CC1=CC(\C=C2\SC(=O)N(CC#C)C2=O)=C(C)N1C1=CC=CC(=C1)[N+]([O-])=O	.	OG	OG	0 worms	OG	.	0	.
wact-208	6951311	Chembridge	CCOC1=C(OCC#C)C=CC(\C=C2C(=O)N(N=C/2C(F)(F)F)C2=CC=C(Cl)C=C2)=C1	.	OG	OG	OG	OG	.	0	.
wact-209	7153658	Chembridge	BrC1=CC=C(C=C1)C1=NN=C(O1)SCC#C	.	OG	OG	OG	OG	.	0	.
wact-21	5129511	Chembridge	n1c(c2sccc2)cnc2c1cccc2	.	OG	OG	OG	OG	.	0	.
wact-210	7468541	Chembridge	COC1=CC=C(C=C1)C1=NN=C(O1)SCC#C	.	OG	OG	OG	OG	.	0	.
wact-211	7961048	Chembridge	CC(C)(OC(=O)NC1=CC=C(C=C1)[N+]([O-])=O)C#C	.	OG	OG	OG	OG	.	0	.
wact-212	5101925	Chembridge	c1([N+](=O)[O-])cc([N+](=O)[O-])ccc1NCc1ccccc1	.	OG	OG	OG	OG	.	0	.
wact-213	5107544	Chembridge	n1(ccc2c1cccc2)c1ccc([N+](=O)[O-])cc1	.	OG	OG	OG	OG	.	0	.
wact-214	5112276	Chembridge	C(C(=O)NC(c1ccccc1)C)(Cl)(Cl)Cl	.	OG	OG	OG	OG	.	0	.
wact-215	5257581	Chembridge	N1(c2ccc(cc2)Cl)CCN(Cc2cc(Br)ccc2)CC1	.	OG	OG	OG	OG	.	0	.
wact-216	5261188	Chembridge	N1(c2ccc(cc2)Cl)CCN(Cc2cc(Cl)ccc2)CC1	.	OG	OG	OG	OG	.	0	.
wact-217	5267171	Chembridge	[N+](=O)(c1ccc(N2CCN(C(=O)c3cc(ccc3)C)CC2)cc1)[O-]	.	OG	OG	OG	OG	.	0	.
wact-218	5379978	Chembridge	C(=C\c1ccc(cc1)OCC=C)/C(=O)c1ccc(cc1)OC	.	OG	OG	OG	OG	.	0	.
wact-219	5427114	Chembridge	c12c3c(CN4CC(CO)CCC4)ccc2ccc2c1c(cc3)ccc2	.	OG	OG	OG	OG	.	0	.
wact-220	5784085	Chembridge	ClC1=CC=C(C=C1)N1CCN(CC1)\N=C/C1=CC=CC=N1	.	OG	OG	OG	OG	.	0	.
wact-221	5789998	Chembridge	[O-][N+](=O)C1=CC=C(N2CCN(CC2)C(=O)C2=CC=C(Cl)C(Cl)=C2)C(F)=C1	.	OG	OG	OG	OG	.	0	.
wact-222	7559273	Chembridge	[N+](=O)(c1ccc(C(=O)N2CCC(C(=O)Nc3ccc(C(F)(F)F)cc3)CC2)cc1)[O-]	.	OG	OG	OG	OG	.	0	.
wact-223	7638283	Chembridge	c1(C(=O)C)cc(OCc2ccc(Cl)cc2)ccc1	.	OG	OG	OG	OG	.	0	.
wact-225	7697590	Chembridge	C1(=C(NC(=S)NC1c1cc(c(c(c1)OC)OC(C)C)Br)c1ccccc1)C(=O)C	.	OG	OG	OG	OG	.	0	.
wact-226	7756241	Chembridge	n1c(noc1CCc1ccccc1)c1ccc(NC(=O)c2sccc2)cc1	.	OG	OG	OG	1 adult + 7 L1s	.	0	.
wact-227	7981165	Chembridge	N(C(=S)Nc1cc(c(cc1)F)Cl)C(=O)C1CC1	.	OG	OG	OG	OG	.	0	.
wact-228	9022273	Chembridge	C(=O)(N1CCN(c2c(cc(NC(=O)c3ccc(cc3)F)cc2)Cl)CC1)c1occc1	.	OG	OG	OG	OG	.	0	.
wact-229	9025971	Chembridge	C(=O)(N1CCN(Cc2ccc(Cl)cc2)CC1)c1ccc(cc1)Cl	.	OG	OG	OG	OG	.	0	.
wact-23	5156707	Chembridge	c1(ncc(o1)c1ccc(cc1)C)c1ccncc1	.	OG	OG	OG	OG	.	0	.
wact-230	9030359	Chembridge	n1c(oc2c1ccc(c2)N)c1ccc(cc1)OC	.	OG	OG	OG	OG	.	0	.
wact-231	9060848	Chembridge	S(=O)(=O)(N1CCCCC1)c1cc(c(cc1)OCCC)C	.	OG	OG	OG	OG	.	0	.
wact-232	12035227	Chembridge	CN(CC1CCN(CCC2=CC=C(Cl)C=C2)CC1)C(=O)C1=CC(F)=CC(F)=C1	.	OG	OG	OG	OG	.	0	.
wact-233	12068801	Chembridge	CS(=O)(=O)C1=NC=C(CN2CCCC2C2=CC=C(F)C=C2)N1CCCC1=CC=CC=C1	.	OG	OG	OG	OG	.	0	.
wact-234	12931419	Chembridge	O=C(NCCC1=CCCCC1)C1=CC=C(OC2CCN(CC3=CC=CC=N3)CC2)C=C1	.	OG	OG	OG	OG	.	0	.
wact-235	13463847	Chembridge	COCCN(CC1=C(C)OC(=N1)C1=CC=C(C=C1)C1=CC=CC=C1)C(C)C	.	OG	OG	OG	OG	.	0	.
wact-236	13840918	Chembridge	CN(CC(O)COC1=CC(CNCCC2=CC=C(F)C=C2)=CC=C1)C1CCCCC1	.	OG	OG	OG	OG	.	0	.
wact-237	14241266	Chembridge	CC(C)CN1CCC(CN(C)CC2=NC(=NO2)C2=CC=C(C=C2)C(F)(F)F)CC1	.	OG	OG	OG	OG	.	0	.
wact-238	15001247	Chembridge	FC(F)(F)C1=CC=C(C=C1)C1=NOC(CN2CCC(CC2)N2CCSCC2)=N1	.	OG	OG	OG	OG	.	0	.
wact-239	15225369	Chembridge	c1(c(c[nH]n1)CNC(c1ccc(cc1)F)C)c1c2c(ccc1)cccc2	.	OG	OG	OG	OG	.	0	.
wact-24	5162985	Chembridge	n1c(cnc2c1cccc2)c1ccc(cc1)OCC	.	OG	OG	OG	OG	.	0	.
wact-240	15247164	Chembridge	CC1=CC=CC(=C1)C1=CC=C(NC(=O)C2CCN(CC3CCOC3)CC2)C=C1	.	OG	OG	OG	OG	.	0	.
wact-241	15359589	Chembridge	FC(F)(F)C1=CC=C(C=C1)C1=NOC(CN2CCC(CC2)OCC2=NC=CC=C2)=N1	.	OG	OG	OG	OG	.	0	.
wact-242	16029475	Chembridge	ClC1=CC=C(C=C1)N1CCC(CC1)NC1COC2=CC=CC=C2C1	.	OG	OG	OG	OG	.	0	.
wact-243	16278342	Chembridge	[H]N1C=C(CNC(C)C2=CC3=C(C=C2)C=C(OC)C=C3)C(=N1)C1=CC(F)=C(OC)C=C1	.	OG	OG	OG	OG	.	0	.
wact-244	16600667	Chembridge	O=C(C1CCCN(CC2=CN=CC=C2)C1)C1=CC=C(C=C1)C1=CC=CC=C1	.	OG	OG	OG	OG	.	0	.
wact-245	16673009	Chembridge	[H]N1C=C(CNCCC2=CC=C(Cl)C=C2)C(=N1)C1=CC(F)=C(OC)C=C1	.	OG	OG	OG	OG	.	0	.
wact-246	17090057	Chembridge	FC(F)(F)C1=CC=C(C=C1)C1=NOC(CN2CCN(CC3=CC=CN=C3)CC2)=N1	.	OG	OG	OG	OG	.	0	.
wact-247	17669894	Chembridge	CN(CC1CCN(CCC2=CC=C(F)C=C2)CC1)C(=O)C1=NOC(=C1)C1=CC=CC=C1	.	OG	OG	OG	OG	.	0	.
wact-248	18225969	Chembridge	FC(F)(F)C1=CC=CC(=C1)C(=O)C1CCCN(CC2=C3C=CN=CC3=CC=C2)C1	.	OG	OG	OG	OG	.	0	.
wact-249	18445248	Chembridge	CN1C=C(CN2CCCC(C2)C(=O)C2=CC=C(C=C2)C2=CC=CC=C2)C=N1	.	OG	OG	OG	OG	.	0	.
wact-25	5242714	Chembridge	n1c(c2c(c(n1)OCC)cccc2)c1ccccc1	.	OG	OG	OG	OG	.	0	.
wact-250	20140683	Chembridge	CN(CC1CCCN(CCC2=CC(=CC=C2)C(F)(F)F)C1)C(=O)C1=CC=C(Cl)S1	.	OG	OG	OG	OG	.	0	.
wact-251	21305438	Chembridge	[H]N1C=C(CNC2CCC2)C(=N1)C1=CC=C(C=C1)C1=CC=CC=C1	.	OG	OG	OG	OG	.	0	.
wact-252	21518826	Chembridge	CN(CC1CCCN(CCC2=CC=C(Cl)C=C2)C1)CC1=CC=CN1C1=NC=CS1	.	OG	OG	OG	OG	.	0	.
wact-253	22072826	Chembridge	COCC1CCN(CC2=C(C)OC(=N2)C2=CC=C(C=C2)C2=CC=CC=C2)CC1	.	OG	OG	OG	OG	.	0	.
wact-254	22239945	Chembridge	CC1=C(C=CC(Cl)=C1)C(=O)C1CCCN(CC2=CC=CN2C2=NC=CS2)C1	.	OG	OG	OG	OG	.	0	.
wact-255	23136888	Chembridge	[H]N1C=C(CNC(C)C2=CC=C(Cl)C=C2)C(=N1)C1=C(F)C=C(OC)C=C1	.	OG	OG	OG	OG	.	0	.
wact-256	24729157	Chembridge	ClC1=CC=CC(=C1)C1=CN2C(SC=C2C(=O)NCCC2=CSC=N2)=N1	.	OG	OG	OG	OG	.	0	.
wact-257	24889917	Chembridge	CC(C)N(CC1=CN(C)N=C1)CC1=C(C)OC(=N1)C1=CC=C(C=C1)C1=CC=CC=C1	.	OG	OG	OG	OG	.	0	.
wact-258	25137964	Chembridge	ClC1=CC=C(C=C1)C1=NOC(CN2CCC(CC2)OC2=CN=CC=C2)=N1	.	OG	OG	OG	OG	.	0	.
wact-259	26207873	Chembridge	CN(CC1CCN(CCC2=CC=CC(F)=C2)CC1)CC1CCC=CC1	.	OG	OG	OG	OG	.	0	.
wact-26	5242766	Chembridge	n1c(c2c(c(n1)OC)cccc2)c1ccccc1	.	30 adults + 0 larvae + lots emb	36 adults + ~150 larvae + lots emb	33 adults + 6 L2/L3 + emb	42 adults + 18 L2/L3 + emb	.	0	.
wact-260	26771177	Chembridge	FC(F)OC1=CC=C(CN2CCCC(C2)NC2=CC=C(F)C=C2)C=C1	.	OG	OG	OG	OG	.	0	.
wact-261	27191049	Chembridge	COCCCNCC1=CN(N=C1C1=C(Cl)C=CC=C1)C1=CC=C(F)C=C1	.	OG	OG	OG	OG	.	0	.
wact-262	28688567	Chembridge	O=C(N1CCC(CC1)C1=CC=NC=C1)C1=NOC(COC2=CC3=C(C=C2)N=CC=C3)=C1	.	OG	OG	OG	OG	.	0	.
wact-263	30231512	Chembridge	FC(F)(F)C1=CC=CC(CC2=NOC(CN3CCC(CC3)C3=CC=NC=C3)=N2)=C1	.	OG	OG	OG	OG	.	0	.
wact-264	30623125	Chembridge	FC1=CC=CC(=C1)C1=CC(NC(=O)C2CCN(CC3CC3)CC2)=CC=C1	.	OG	OG	OG	OG	.	0	.
wact-265	31868601	Chembridge	CC(C)N1N=C(C)C(CN2CCC(CC2)C(=O)NC2=CC=C(C=C2)C2=CC(C)=CC=C2)=C1C	.	OG	OG	OG	OG	.	0	.
wact-266	31901819	Chembridge	[H]N1C=C(CNC2CCC3=C2C=CC=C3)C(=N1)C1=CC2=C(O1)C=CC=C2	.	OG	OG	OG	OG	.	0	.
wact-267	31932666	Chembridge	CCCN1CCC(CC1)C(=O)NC1=CC=C(C=C1)C1=CC(C)=CC=C1	.	OG	OG	OG	OG	.	0	.
wact-268	32127179	Chembridge	CN(CC1CCN(CCC2=CC=C(Cl)C=C2)CC1)C1CCC1	.	OG	OG	OG	OG	.	0	.
wact-269	32554611	Chembridge	CN(CCC1=CN(C)N=C1)CC1=NC(=NO1)C1=CC=C(C=C1)C(F)(F)F	.	OG	OG	OG	OG	.	0	.
wact-27	5246017	Chembridge	C(=O)(c1occc1)Nc1ccc(I)cc1	.	OG	OG	OG	OG	.	0	.
wact-270	32651441	Chembridge	CCCN1CCCC(C1)C(=O)NC1=CC=C(C=C1)C1=CC(OC)=CC=C1	.	OG	OG	OG	OG	.	0	.
wact-271	33160382	Chembridge	CN(CC1CCCN1C)CC1=NC(=NO1)C1=CC=C(C=C1)C(F)(F)F	.	OG	OG	OG	OG	.	0	.
wact-272	33296972	Chembridge	CC1(CCC(=O)N2CCC3(C2)CCCN(CC2=C(F)C(F)=CC=C2)C3)CC1	.	OG	OG	OG	OG	.	0	.
wact-273	33300509	Chembridge	c1(nc(c2ccc(cc2)Cl)cnn1)N1CCC(CC1)c1ccncc1	.	OG	OG	OG	OG	.	0	.
wact-274	36003019	Chembridge	FC1=CC=CC(NC2CCCN(CC3=CN(N=C3)C3=CC=CC=C3)C2)=C1	.	OG	OG	OG	OG	.	0	.
wact-275	38038019	Chembridge	COCCNC(=O)C1=CC(Cl)=C(OC2CCN(C\C=C\C3=CC=C(F)C=C3)CC2)C=C1	.	OG	OG	OG	OG	.	0	.
wact-276	38268838	Chembridge	CC1=C(CN2CCC(CC2)C2=CC=NC=C2)N=C(O1)C1=CC(Cl)=CC=C1	.	OG	OG	OG	OG	.	0	.
wact-277	38315382	Chembridge	FC1=CC=C(C=C1)C1CCCN1C(=O)C1=NOC(COC2=CC3=C(C=C2)N=CC=C3)=C1	.	OG	OG	OG	OG	.	0	.
wact-278	38941253	Chembridge	C1CC2CN(CCN2C1)C1=NC(=CN=N1)C1=CC=CC2=CC=CC=C12	.	OG	OG	OG	OG	.	0	.
wact-279	39722006	Chembridge	CC1=C(CN2CCCCC2CCO)N=C(O1)C1=CC=C(C=C1)C1=CC=CC=C1	.	OG	OG	OG	OG	.	0	.
wact-28	5260944	Chembridge	N1(c2ccc(cc2)F)CCN(Cc2c(c(Cl)ccc2)Cl)CC1	.	OG	OG	OG	OG	.	0	.
wact-280	40139765	Chembridge	FC1=CC(Cl)=C(OCC2=CC(=NO2)C(=O)N2CCC(CC2)C2=CC=NC=C2)C=C1	.	OG	OG	OG	OG	.	0	.
wact-281	40525782	Chembridge	COC1CCN(CC2=C(C)OC(=N2)C2=CC=C(C=C2)C2=CC=CC=C2)CC1	.	OG	OG	OG	OG	.	0	.
wact-282	41629182	Chembridge	c1(nc(c2cc3c(cc2)cccc3)cnn1)N[C@H](C(=O)OC)CCC(=O)OC	.	OG	OG	OG	OG	.	0	.
wact-283	41675573	Chembridge	CN(CC(O)COC1=CC=C(CNCC2=CC=C(Cl)C=C2)C=C1)CC1=CC=CC=C1	.	OG	OG	OG	OG	.	0	.
wact-284	41687128	Chembridge	OC(COC1=CC=C(CNCC2=CC=C(C=C2)C(F)(F)F)C=C1)CN1CCCCC1	.	OG	OG	OG	OG	.	0	.
wact-285	41790376	Chembridge	n1c(noc1CN1CCN(Cc2nc(sc2)C)CC1)c1ccc(C(F)(F)F)cc1	.	OG	OG	OG	OG	.	0	.
wact-286	42522054	Chembridge	C(c1ccc(NC(=O)CCC2CN(Cc3cnc(nc3)SC)CCC2)cc1)(F)(F)F	.	OG	OG	OG	OG	.	0	.
wact-287	46625466	Chembridge	n1c2c(cc(cc2)F)ccc1CN(CC1CCN(CCc2cc(F)ccc2)CC1)C	.	OG	OG	OG	OG	.	0	.
wact-288	47295199	Chembridge	COC1=CC2=C(OCO2)C=C1CNC1CCCN(C1)C1=CC=C(C=N1)C(F)(F)F	.	OG	OG	OG	OG	.	0	.
wact-289	49340567	Chembridge	CC(CCN1C=CC=N1)NC(=O)C1=CSC2=NC(=CN12)C1=CC=C(C=C1)C(F)(F)F	.	OG	OG	OG	OG	.	0	.
wact-29	5264250	Chembridge	s1c(ccc1CN1CCN(c2ccc(cc2)F)CC1)Br	.	OG	OG	OG	OG	.	0	.
wact-290	49851711	Chembridge	c1(C(=O)N2[C@@H]3C[C@@H](C2)CC3)noc(c1)COc1cc2c(nccc2)cc1	.	OG	OG	OG	OG	.	0	.
wact-291	50853264	Chembridge	CCN1C=C(CN2CCCC(C2)C(=O)C2=CC=C(C(F)=C2)C2=CC=CC=C2)C=N1	.	OG	OG	OG	OG	.	0	.
wact-292	51305872	Chembridge	CN(CC1CCN(CCC2=CC=C(F)C=C2)CC1)CC1=C(F)C(F)=CC=C1	.	OG	OG	OG	OG	.	0	.
wact-293	51656246	Chembridge	CC(N(C)CC1=C(C)OC(=N1)C1=CC=C(F)C=C1)C1=CC=CS1	.	OG	OG	OG	OG	.	0	.
wact-294	55540880	Chembridge	CC(CC1=NC=CN=C1)NC(=O)C1=CSC2=NC(=CN12)C1=CC=CC(=C1)C(F)(F)F	.	OG	OG	OG	OG	.	0	.
wact-295	55593352	Chembridge	FC1=CC=C(CN2CCCN(CC3=NC(=NO3)C3=CC4=C(OCO4)C=C3)CC2)C=C1	.	OG	OG	OG	OG	.	0	.
wact-296	56524975	Chembridge	CCN1C=CN=C1CN1CCCC(C1)C(=O)C1=CC=C(C=C1)C1=CC=CC=C1	.	OG	OG	OG	OG	.	0	.
wact-297	56992273	Chembridge	[H]N1C=C(CNC(CC)C2=CC=C(F)C=C2)C(=N1)C1=CC(C)=C(C)C=C1	.	OG	OG	OG	OG	.	0	.
wact-298	59471216	Chembridge	O=C(C1CCCN(C1)C1CCOCC1)C1=CC=C(C=C1)C1=CC=CC=C1	.	OG	OG	OG	OG	.	0	.
wact-299	60253082	Chembridge	FC(F)(F)C1=CC=C(C=C1)C1=NC(=CS1)C(=O)N1CCC2(C1)CCCN(CC1CC1)C2	.	OG	OG	OG	OG	.	0	.
wact-3	5347759	Chembridge	[N+](=O)(c1ccc(CSc2ccc(Cl)cc2)cc1)[O-]	.	OG	OG	OG	OG	.	0	.
wact-30	5267230	Chembridge	N1(c2ccc(cc2)F)CCN(Cc2cc(Br)ccc2)CC1	.	OG	OG	OG	OG	.	0	.
wact-300	60911419	Chembridge	CC1=NC(CNC2CCCC3=C2C=NN3C2=CC=C(C=C2)C(C)(C)C)=CN1	.	OG	OG	OG	OG	.	0	.
wact-301	60984467	Chembridge	CC1=CC=C(C=C1)N1C=C(CNCCC2=CSC=N2)C(=N1)C1=CC=C(F)C=C1	.	OG	OG	OG	OG	.	0	.
wact-302	61220080	Chembridge	FC1=CC=CC(=C1)C1=CC=C(NC(=O)C2CCCN(CC3=CC=CC=N3)C2)C=C1	.	OG	OG	OG	OG	.	0	.
wact-303	61652237	Chembridge	CN(CC1CCN(CCC2=CC=C(F)C=C2)CC1)CC1CCC=CC1	.	OG	OG	OG	OG	.	0	.
wact-304	62080442	Chembridge	CN(CC1CCN(CCC2=CC=C(Cl)C=C2)CC1)C(=O)C1=CC=C(C=C1)C(F)(F)F	.	OG	OG	OG	OG	.	0	.
wact-305	64046781	Chembridge	CC(C)CN(C)CC1=C(C)OC(=N1)C1=CC2=CC=CC=C2C=C1	.	OG	OG	OG	OG	.	0	.
wact-306	64978246	Chembridge	COC1=CC=C(CN2CCCC(C2)C(=O)C2=CC=C(Cl)C=C2)C=C1	.	OG	OG	OG	OG	.	0	.
wact-307	66310060	Chembridge	[H]N1C=C(CNCC2=CC=C(OC(F)(F)F)C=C2)C(=N1)C1=CC(C)=C(C)C=C1	.	OG	OG	OG	OG	.	0	.
wact-308	67414995	Chembridge	FC1=CC=C(C=C1)N1CCN(CC1)C1CCCN(CC2=CC=C(C=C2)C(F)(F)F)C1	.	OG	OG	OG	OG	.	0	.
wact-309	68071244	Chembridge	CC1(C)CC(NCC2=CNN=C2C2=CC=CC=C2)C2=C(C1)N(N=C2)C1=CC(F)=CC=C1	.	OG	OG	OG	OG	.	0	.
wact-31	5277421	Chembridge	C(=O)(N1CCN(c2ccc([N+](=O)[O-])cc2)CC1)Nc1cc(Cl)ccc1	.	OG	OG	OG	OG	.	0	.
wact-310	68844017	Chembridge	ClC1=CC=C(CC2=NC3=CC(=CC=C3O2)C(=O)N2CCC(CC2)C2=CC=NC=C2)C=C1	.	OG	OG	OG	OG	.	0	.
wact-311	68890971	Chembridge	n1c2c(oc1CCCc1ccccc1)ccc(C(=O)N1CCC(CC1)c1ccncc1)c2	.	OG	OG	OG	OG	.	0	.
wact-312	69676282	Chembridge	CN(CC1=CC=NN1)CC1=CN(N=C1C1=C(Cl)C=CC=C1)C1=CC=C(F)C=C1	.	OG	OG	OG	OG	.	0	.
wact-313	71180351	Chembridge	FC1=CC=C(CN2CCCN(CC3=NC(=NO3)C3=CC=C(C=C3)C(F)(F)F)CC2)C=C1	.	OG	OG	OG	OG	.	0	.
wact-314	72077860	Chembridge	CCN1C=C(CN2CCCC(C2)C(=O)C2=CC=C(C=C2)C2=CC=CC=C2)C=N1	.	OG	OG	OG	OG	.	0	.
wact-315	72809307	Chembridge	CN(CC1CCN(CCC2=CC=C(Cl)C=C2)CC1)C1CCSCC1	.	OG	OG	OG	OG	.	0	.
wact-316	73510397	Chembridge	CN(CC1=CN(C)N=C1)CC1=CN(N=C1C1=C(Cl)C=CC=C1)C1=CC=C(F)C=C1	.	OG	OG	OG	OG	.	0	.
wact-317	75786461	Chembridge	ClC1=CC=C(C=C1)C(=O)C1CCCN(CC2=CC3=C(C=C2)N=CC=C3)C1	.	OG	OG	OG	OG	.	0	.
wact-318	76941293	Chembridge	COCCOC1CCN(CC2=CN(N=C2C2=CC=C(F)C=C2)C2=CC=C(C)C=C2)CC1	.	OG	OG	OG	OG	.	0	.
wact-319	76953249	Chembridge	CN(CC1CCN(CCC2=CC=C(Cl)C=C2)CC1)C1CCOCC1	.	OG	OG	OG	OG	.	0	.
wact-32	5278162	Chembridge	n1c(nc2c(c1c1ccccc1)CCCC2)c1ccccc1	.	OG	OG	OG + emb	OG + emb	.	0	.
wact-320	78384571	Chembridge	C(=O)(Nc1cc(c2cc(F)ccc2)ccc1)C1CCN(CC1)CCC	.	OG	OG	OG	OG	.	0	.
wact-321	80079641	Chembridge	n1c(noc1CN1CCC(CC1)c1ccncc1)c1cc(Cl)ccc1	.	OG	OG	OG	OG	.	0	.
wact-322	82408900	Chembridge	CCC(NC(=O)C1=CC=C2OC(CC3=CC=C(Cl)C=C3)=NC2=C1)C1=CC=NC=C1	.	OG	OG	OG	OG	.	0	.
wact-323	82454493	Chembridge	FC1=CC=CC(=C1)C1=CC=C(NC(=O)C2CCCN(CCCN3C=CC=N3)C2)C=C1	.	OG	OG	OG	OG	.	0	.
wact-324	83502312	Chembridge	c12c(non1)ccc(c2)CN(CC1CCN(CCc2cc(F)ccc2)CC1)C	.	OG	OG	OG	OG	.	0	.
wact-325	84263215	Chembridge	c1(ncc(CN2CC(N3CCCC3)CCC2)cn1)c1ccc(cc1)Cl	.	OG	OG	OG	OG	.	0	.
wact-326	87534230	Chembridge	COC1=CC=C(OC)C(CN(C)CC2CCN(CCC3=CC=CC(F)=C3)CC2)=C1	.	OG	OG	OG	OG	.	0	.
wact-327	89212663	Chembridge	C(=O)(N1CC(N2CCN(CC2)c2ccccc2)CCC1)Nc1ccc(Cl)cc1	.	OG	OG	OG	OG	.	0	.
wact-328	89730162	Chembridge	ClC1=CC=C(C=C1)C(=O)C1CCCN(CC2=CC=CC=C2)C1	.	OG	OG	OG	OG	.	0	.
wact-329	89952217	Chembridge	CN(CC1CCN(CCC2=CC=C(Cl)C=C2)CC1)CC1=CC=CN1C1=NC=CC=N1	.	OG	OG	OG	OG	.	0	.
wact-33	5308651	Chembridge	c12[nH]c3c(c1CCC/C/2=N\O)cc(cc3)Cl	.	OG	OG	OG	OG	.	0	.
wact-330	91815776	Chembridge	CN(CC1=C(C)OC(=N1)C1=CC=C(C=C1)C(F)(F)F)C(C1CC1)C1CC1	.	OG	OG	OG	OG	.	0	.
wact-331	92781405	Chembridge	FC(F)(F)C1=CC=CC(=C1)N1CCN(CC1)C1CCCN(CC2=CC=CC3=C2OCO3)C1	.	OG	OG	OG	OG	.	0	.
wact-332	93128236	Chembridge	CCN(CC1CCCN(CCC2=CC=CC(F)=C2)C1)CC1=CC=CC2=C1OCO2	.	OG	OG	OG	OG	.	0	.
wact-333	95822594	Chembridge	COC1=CC=C(NC(=O)N2CCCC(C2)C(=O)C2=CC3=C(C=CC=C3)C=C2)C=C1	.	OG	OG	OG	OG	.	0	.
wact-334	96684492	Chembridge	c1(nc(on1)CN1CCC(CC1)c1ccncc1)C1(c2ccc(cc2)C)CCCC1	.	OG	OG	OG	OG	.	0	.
wact-335	97122226	Chembridge	C(N1CCN(CC1)C1=C2CCCC2=NC(=N1)C1=CC=CC=C1)C1=COC=C1	.	OG	OG	OG	OG	.	0	.
wact-336	97123311	Chembridge	FC(F)(F)C1=CC=C(C=C1)C1=NOC(CN2CCN(CC2)C2CCCC2)=N1	.	OG	OG	OG	OG	.	0	.
wact-337	97955405	Chembridge	n1c(c(oc1c1ccc(cc1)c1ccccc1)C)CN(C(C)C)C	.	OG	OG	OG	OG	.	0	.
wact-338	98121259	Chembridge	FC1=CC=C(CN2CCCC3(CCN(CCCC(F)(F)F)C3)C2)C=C1F	.	OG	OG	OG	OG	.	0	.
wact-339	99017729	Chembridge	CC(NC(=O)C1=CSC2=NC(=CN12)C1=CC=C(C=C1)C(F)(F)F)C1=NC=NC=C1	.	OG	OG	OG	OG	.	0	.
wact-34	5328638	Chembridge	c1(C(=O)O/N=C(/c2ccccc2)\N)c(Cl)cccc1	.	OG	OG	OG	OG	.	0	.
wact-340	99432361	Chembridge	CN1C=C(CN2CCCC(C2)C(=O)C2=CC=C(C(F)=C2)C2=CC=CC=C2)C=N1	.	OG	OG	OG	OG	.	0	.
wact-341	BAS 00459446	Asinex	C1=CC=C(C=C1)C#CC1=CC=CC2=CC=CC=C12	.	OG	OG	OG	OG	.	0	.
wact-342	BAS 04456475	Asinex	CC1=CC=C(C=C1)C1=NN=C(O1)SCC#C	.	OG	OG	OG	OG	.	0	.
wact-343	ASN 07115927	Asinex	FC(F)(F)C1=C(Cl)C=CC(NC(=O)NC2=NC(SCC#C)=NS2)=C1	.	OG	OG	OG	OG	.	0	.
wact-344	BAS 00211457	Asinex	C#CCOC1=NC(=NC(OCC#C)=N1)N(C1=CC=CC=C1)C1=CC=CC=C1	.	OG	OG	OG	OG	.	0	.
wact-345	BAS 05496293	Asinex	C#CCSC1=NN=C(O1)C1=CC=CC=C1	.	OG	OG	OG	OG	.	0	.
wact-346	T6080927	Enamine	CC1=C(N=C(NC(=O)C2=CC(=CC=C2)S(=O)(=O)NCC#C)S1)C1=CC(F)=C(F)C=C1	.	OG	OG	OG	OG	.	0	.
wact-347	T6141724	Enamine	COC1=C(OCC#C)C(Cl)=CC(\C=C(Cl)\C2=NC(=NO2)C2=CSC=C2)=C1	.	OG	OG	OG	OG	.	0	.
wact-348	T6122378	Enamine	ClC1=CC=C(\C=C\C(=O)NC2=CC(=CC=C2)C#C)C=C1	.	OG	OG	OG	OG	.	0	.
wact-349	T6237672	Enamine	ClC1=CC=C(C=C1)C1=NOC(COC(=O)C2=CC(=CC=C2)S(=O)(=O)NCC#C)=C1	.	OG	OG	OG	OG	.	0	.
wact-35	5344384	Chembridge	n1(c2c(c3c1cccc3)cc(cc2)Cl)CO	.	OG	OG	OG	OG	.	0	.
wact-350	T5854830	Enamine	FC1=CC=C(C=C1)N1CCN(CC1)S(=O)(=O)C1=C(Cl)C=CC(=C1)C(=O)NC1=CC(=CC=C1)C#C	.	OG	OG	OG	OG	.	0	.
wact-352	F1874-0010	Life Chemicals	C#CCSC1=NC=NC2=C1C=NN2C1=CC=CC=C1	.	OG	OG	OG	OG	.	0	.
wact-353	F1365-3014	Life Chemicals	CC(C)OC1=CC=C(C=C1)C(=O)\N=C1/SC2=C(C=CC(=C2)S(N)(=O)=O)N1CC#C	.	OG	OG	OG	OG	.	0	.
wact-353	F2556-0396	Life Chemicals	CS(=O)(=O)C1=CC=CC=C1C(=O)\N=C1/SC2=C(C=CC(F)=C2)N1CC#C	.	OG	OG	OG	OG	.	0	.
wact-355	STK242007	Vitas	C#CCOC1=CC=C(C=C1)C1=NC(=NO1)C1=CC=CN=C1	.	OG	OG	OG	OG	.	0	.
wact-356	STK019003	Vitas	ClC1=CC=CC=C1C(=O)N\N=C1\C(=O)N(CC#C)C2=C1C=C(Br)C=C2	.	OG	OG	OG	OG	.	0	.
wact-357	STK066883	Vitas	BrC1=C(OCC#C)C=CC2=CC=CC=C12	.	OG	OG	OG	OG	.	0	.
wact-358	STK027936	Vitas	COC(=O)C1=CC=CC(N2C(C)=CC(\C=C3\SC(=O)N(CC#C)C3=O)=C2C)=C1C	.	OG	OG	OG	OG	.	0	.
wact-359	STK197039	Vitas	COC1=CC(\C=N\NC(=O)C2=CC3=C(O2)C=CC=C3)=CC(Cl)=C1OCC1=CC=CC=C1C#C	.	OG	OG	OG	OG	.	0	.
wact-36	5347942	Chembridge	n1(c2c(c3c1cccc3)cccc2)CN(C)C	.	OG	OG	OG	OG	.	0	.
wact-363	5175874	Chembridge	c1(nc2c([nH]1)cc([N+](=O)[O-])cc2)c1ccccc1	.	OG	OG	OG	OG	.	0	.
wact-364	5269853	Chembridge	[N+](=O)(c1ccc(N2CCN(C(=O)c3sccc3)CC2)cc1)[O-]	.	OG	OG	OG	OG	.	0	.
wact-365	5318059	Chembridge	C(=O)(c1cc(Cl)ccc1)N/N=C/c1ccc(SC)cc1	.	OG	OG	OG	OG	.	0	.
wact-366	5754293	Chembridge	C(=O)(Nc1ccc(Cc2ccncc2)cc1)c1ccc(cc1)OCC	.	OG	OG	OG	OG	.	0	.
wact-367	5851912	Chembridge	N1(C(=S)S/C(=C\c2oc(cc2)c2cc(Cl)ccc2)/C1=O)C1CS(=O)(=O)CC1	.	OG	OG	OG	OG	.	0	.
wact-368	6046827	Chembridge	C(=S)(Nc1ccc(Cl)cc1)NCc1ccc(Cl)cc1	.	OG	OG	OG	OG	.	0	.
wact-369	6385908	Chembridge	C(=O)(NC(=S)Nc1cc(c(cc1)Cl)Cl)c1c(I)cccc1	.	OG	OG	OG	OG	.	0	.
wact-37	5347949	Chembridge	c1(=O)n(ncc(c1Cl)OC)c1cc(C(F)(F)F)ccc1	.	OG	OG	OG	OG	.	0	.
wact-370	6607196	Chembridge	C(=S)(NC(=O)CCC)Nc1cc(c(cc1)Cl)Cl	.	OG	OG	OG	OG	.	0	.
wact-373	5191873	Chembridge	c1(nc2c(s1)cc(cc2)C)c1ccc(/N=C/c2c(cc(cc2)O)O)cc1	.	OG	OG	OG	OG	.	0	.
wact-374	5191886	Chembridge	c1(nc2c(s1)cc(cc2)C)c1ccc(/N=C/c2ccc(cc2)O)cc1	.	OG	OG	OG	OG	.	0	.
wact-375	5191891	Chembridge	c1(nc2c(s1)cc(cc2)C)c1ccc(/N=C/c2ccc(cc2)OC)cc1	.	OG	OG	OG	OG	.	0	.
wact-376	5192203	Chembridge	c1(nccs1)/N=C/c1ccc(C#Cc2ccccc2)cc1	.	OG	OG	OG	OG	.	0	.
wact-377	5192207	Chembridge	C(=O)(Nc1cc(/N=C/c2ccc(C#Cc3ccccc3)cc2)c(cc1)OC)c1ccccc1	.	OG	OG	OG	OG	.	0	.
wact-378	5192696	Chembridge	n1c(oc(=O)cc1c1ccccc1)c1ccccc1	.	OG	OG	OG	OG	.	0	.
wact-379	5213811	Chembridge	C(=C(\N1CCCCC1)/c1ccccc1)/C(=O)c1ccc(cc1)C	.	OG	OG	OG	OG	.	0	.
wact-38	5356411	Chembridge	o1c(nnc1SCc1ccccc1)c1ccccc1	.	OG	OG	OG	OG	.	0	.
wact-380	5218876	Chembridge	C(=O)(c1sccc1)Nc1ccc(Cl)cc1	.	OG	OG	OG	OG	.	0	.
wact-382	5223162	Chembridge	n1c(oc2c1cccc2)/C=C/c1ccc(cc1)OC	.	OG	OG	OG	OG	.	0	.
wact-383	5226638	Chembridge	c1(nc2c(s1)cc(cc2)C)c1ccc(/N=C/c2cc(c(OC(=O)C)cc2)OC)cc1	.	OG	OG	OG	OG	.	0	.
wact-384	5236279	Chembridge	N(C(=S)Nc1ccc(Br)cc1)C(=O)C(C)(C)C	.	OG	OG	OG	OG	.	0	.
wact-385	5238652	Chembridge	[N+](=O)(/C=C/c1ccc(cc1)OCC)[O-]	.	OG	OG	OG	OG	.	0	.
wact-386	5249950	Chembridge	n1c(oc2c1cc(N)cc2)c1cc(c(cc1)Cl)Cl	.	OG	OG	OG	OG	.	0	.
wact-387	5250055	Chembridge	c1(nc2c(s1)cccc2)c1cc(N)ccc1	.	OG	OG	OG	OG	.	0	.
wact-388	5253724	Chembridge	n1(c(nc2c1cc(c(c2)Br)Br)C)c1ccccc1	.	OG	OG	OG	OG	.	0	.
wact-389	5265927	Chembridge	c12[nH]c3c(c1CCCC2NCCc1ccccc1)cc(cc3)Br.Cl	.	OG	OG	OG	OG	.	0	.
wact-39	5357418	Chembridge	c1(oc(nn1)SCCCC)c1c(cc(cc1)Cl)Cl	.	OG	OG	OG	OG	.	0	.
wact-391	5307255	Chembridge	[N+](=O)(c1ccc(N/C=C/C(=O)c2ccccc2)cc1)[O-]	.	0 worms	0 worms	0 worms	6 L1s	.	0	.
wact-392	5307331	Chembridge	c12[nH]c3c(c1CCCC2NCc1ccccc1)cc(cc3)Br	.	OG	OG	OG	OG	.	0	.
wact-394	5320516	Chembridge	c1(nc2c(s1)cc(cc2)C)c1ccc(/N=C/c2c[nH]c3c2cccc3)cc1	.	OG	OG	OG	OG	.	0	.
wact-395	5320745	Chembridge	n1c(oc2c1cc(N)cc2)c1ccc(cc1)Cl	.	OG	OG	OG	OG	.	0	.
wact-396	5322542	Chembridge	c1(nc2c(o1)cccc2)SC(=O)OCc1ccccc1	.	OG	OG	OG	OG	.	0	.
wact-397	5324422	Chembridge	C(=O)(c1ccc(cc1)c1ccccc1)N/N=C/c1ccc(cc1)OCC	.	OG	OG	OG	OG	.	0	.
wact-398	5325961	Chembridge	C(COC(=O)Nc1cc(c(cc1)Cl)Cl)(F)(F)F	.	OG	OG	OG	OG	.	0	.
wact-399	5328241	Chembridge	C(=O)(c1cc(Br)ccc1)NCCCCc1ccccc1	.	OG	OG	OG	OG	.	0	.
wact-4	5352487	Chembridge	c1(oc(nn1)SCC)c1c(cc(cc1)Cl)Cl	.	OG	OG	OG	OG	.	0	.
wact-40	5360297	Chembridge	c1(nc2c(o1)cccc2)c1nc2c(cc1)cccc2	.	OG	OG	OG	OG	.	0	.
wact-400	5329246	Chembridge	c1(C(=O)NCCCCc2ccccc2)c(F)cccc1	.	OG	OG	OG	OG	.	0	.
wact-401	5329655	Chembridge	C(=O)(c1sccc1)Oc1ccc(Br)cc1	.	OG	OG	OG	OG	.	0	.
wact-402	5332317	Chembridge	c1(C(=O)NCc2c(OC)cccc2)c(I)cccc1	.	OG	OG	OG	OG	.	0	.
wact-403	5333670	Chembridge	C(=O)(c1sccc1)O/N=C(/c1ccccc1)\N	.	OG	OG	OG	OG	.	0	.
wact-404	5337892	Chembridge	C(=O)(c1occc1)O/N=C(/c1ccccc1)\N	.	OG	OG	OG	OG	.	0	.
wact-406	5353518	Chembridge	C(=O)(c1c(C)cccc1)NCCc1ccccc1	.	OG	OG	OG	OG	.	0	.
wact-407	5354856	Chembridge	S(=O)(=O)(Nc1cc(cc(c1)Cl)Cl)c1ccc(cc1)Cl	.	OG	OG	OG	OG	.	0	.
wact-408	5357768	Chembridge	S(=O)(=O)(Nc1c(cc(cc1)I)C)c1ccc(cc1)F	.	OG	OG	OG	OG	.	0	.
wact-409	5357833	Chembridge	c1(=O)n(ncc(c1OC)Cl)c1cc(ccc1)C	.	OG	OG	OG	OG	.	0	.
wact-41	5360486	Chembridge	N1(CCCCCOc2ccc(I)cc2)CCOCC1	.	OG	OG	OG	OG	.	0	.
wact-410	5365202	Chembridge	N1(CCCCCOc2ccc(Br)cc2)CCOCC1	.	OG	OG	OG	OG	.	0	.
wact-411	5365211	Chembridge	c12c(OCO1)ccc(/C=C/C(=O)Nc1ccc(Cl)cc1)c2	.	OG	OG	OG	OG	.	0	.
wact-412	5365506	Chembridge	c1(ncc(cn1)N)c1ccc(cc1)OCCCC	.	OG	OG	OG	OG	.	0	.
wact-413	5376757	Chembridge	C(=C\c1ccccc1)/C(=O)c1cc2c(OCCO2)cc1	.	OG	OG	OG	OG	.	0	.
wact-415	5403320	Chembridge	c1(nc2c(s1)cccc2)c1ccc(NC(=O)c2c(F)cccc2)cc1	.	0 worms	0 worms	0 worms	0 worms	.	0	.
wact-416	5404872	Chembridge	C(=C\Nc1ccc(Br)cc1)/C(=O)c1ccccc1	.	2 adults	0 worms	0 worms	0 worms	.	0	.
wact-417	5405132	Chembridge	[N+](=O)(c1cc(C(F)(F)F)ccc1NCc1cnccc1)[O-]	.	OG	OG	OG	OG	.	0	.
wact-418	5406747	Chembridge	C(=O)(Nc1cc(c(cc1)Cl)Cl)OCc1occc1	.	OG	OG	OG	OG	.	0	.
wact-419	5469460	Chembridge	CCCCOC(=O)NC1=CC=C(C=C1)[N+]([O-])=O	.	OG	OG	OG	OG	.	0	.
wact-42	5373716	Chembridge	c12[nH]c3c(c1CCCC2/N=C/c1ccc(F)cc1)cc(cc3)C	.	OG	OG	OG	OG	.	0	.
wact-420	5486398	Chembridge	OC1=C(Cl)C=C(Cl)C=C1\C=N\NC1=CC=CC=C1	.	OG	OG	OG	OG	.	0	.
wact-421	5488503	Chembridge	[O-][N+](=O)C1=CN=C(C=C1)N1CCC2=C(C1)C=CC=C2	.	OG	OG	OG	OG	.	0	.
wact-422	5489051	Chembridge	C(=C\Nc1c(I)cccc1)/C(=O)c1ccccc1	.	OG	OG	OG	OG	.	0	.
wact-423	5547023	Chembridge	COC1=CC=C(CNC2=CC=C(Br)C=C2)C=C1	.	OG	OG	OG	OG	.	0	.
wact-424	5567448	Chembridge	ClC1=CC2=C(OC(=CC2=O)C(Cl)(Cl)Cl)C=C1	.	OG	OG	OG	OG	.	0	.
wact-426	5582341	Chembridge	COC1=CC=C(\C=C\C(=O)\C=C\C2=CC=CC=C2)C=C1	.	OG	OG	OG	OG	.	0	.
wact-427	5604045	Chembridge	[N+](=O)(c1c(C(=O)NCCOc2ccc(C(C)(C)C)cc2)cccc1)[O-]	.	OG	OG	OG	OG	.	0	.
wact-428	5622205	Chembridge	c1(nc2c(s1)cc(cc2)C)c1ccc(NC(=O)c2occc2)cc1	.	0 worms	0 worms	0 worms	0 worms	.	0	.
wact-429	5647993	Chembridge	c12c(c(c(s1)C)C)c(ncn2)NCCc1ccccc1	.	OG	OG	OG	OG	.	0	.
wact-43	5404871	Chembridge	c1(cc(ccc1C)Cl)N/C=C/C(=O)c1ccccc1	.	OG	OG	OG	36 adults + 40 larvae	.	0	.
wact-430	5652685	Chembridge	Br.CC1=NN2C=C(N=C2S1)C1=CC=C(Cl)C=C1	.	OG	OG	OG	OG	.	0	.
wact-431	5671873	Chembridge	n12c(nnc1c1ccc(cc1)C)c1c(CC2(C)C)cccc1	.	OG	OG	OG	OG	.	0	.
wact-432	5689365	Chembridge	C(Oc1ccc(c2ncc(cc2)CCC)cc1)(F)(F)F	.	OG	OG	OG	OG	.	0	.
wact-433	5691479	Chembridge	FC1=CC=C(C=C1)C1=CN2C=CSC2=N1	.	OG	OG	OG	OG	.	0	.
wact-434	5691480	Chembridge	CCC1=CC=C(C=C1)C1=CN2C=CSC2=N1	.	OG	OG	OG	OG	.	0	.
wact-435	5691498	Chembridge	BrC1=CC=CC(=C1)C1=CN2C=CC=CC2=N1	.	OG	OG	OG	OG	.	0	.
wact-436	5691502	Chembridge	CC1=CC2=NC(=CN2C=C1)C1=CC=C(F)C=C1	.	OG	OG	OG	OG	.	0	.
wact-437	5699532	Chembridge	N1(C(=O)/C=C/c2c(cc(cc2)Cl)Cl)CCN(c2ccc(cc2)F)CC1	.	OG	OG	OG	OG	.	0	.
wact-438	5748727	Chembridge	CCC1=CC2=C(OC(=N2)C2=CC(N)=CC=C2)C=C1	.	OG	OG	OG	OG	.	0	.
wact-439	5784320	Chembridge	CC1=C(C=C(F)C(=C1)N1CCN(CC1)C(=O)C1=CC=CC=C1)[N+]([O-])=O	.	OG	OG	OG	OG	.	0	.
wact-44	5415567	Chembridge	N1(c2ccc(cc2)C)CCN(CC1)C/C=C/c1ccccc1	.	OG	OG	OG	OG	.	0	.
wact-440	5801844	Chembridge	N(=C(\c1ccncc1)/N)/OC(=O)COc1c(cc(cc1)Cl)Br	.	OG	OG	OG	OG	.	0	.
wact-441	5811694	Chembridge	n1c(noc1COc1ccc(C(C)(C)C)cc1)c1ccncc1	.	OG	OG	OG	OG	.	0	.
wact-442	5850494	Chembridge	[N+](=O)(c1ccc(NC(=O)N2CCN(c3ccc(cc3)F)CC2)cc1)[O-]	.	OG	OG	OG	OG	.	0	.
wact-443	5884071	Chembridge	C(=S)(Nc1ccccc1)NCCc1ccc(Cl)cc1	.	OG	OG	OG	OG	.	0	.
wact-444	5910902	Chembridge	n1c(noc1C1CCC(CC1)CCCC)c1cnccc1	.	OG	OG	OG	OG	.	0	.
wact-447	6038429	Chembridge	N1(c2c(cc(C(=O)CCC)cc2)F)CCC(CC1)C	.	OG	OG	OG	OG	.	0	.
wact-448	6083787	Chembridge	n1c(oc2c1cc(cc2)C)c1ccc(cc1)Cl	.	OG	0 worms	0 worms	0 worms	.	0	.
wact-449	6084347	Chembridge	C(=O)(O/N=C(/Cc1sccc1)\N)COc1ccc(Br)cc1	.	OG	OG	OG	OG	.	0	.
wact-45	5426270	Chembridge	[N+](=O)(c1ccc(N2CCN(CC3CCCCC3)CC2)cc1)[O-]	.	OG	OG	OG	OG	.	0	.
wact-450	6089573	Chembridge	c1([N+](=O)[O-])c(N2CCN(C(=O)c3ccc(cc3)F)CC2)ccc(C(F)(F)F)c1	.	OG	OG	OG	OG	.	0	.
wact-451	6138646	Chembridge	c1(c(c2c(s1)CCCC2)C(=O)O)NC(=S)NC(=O)c1ccccc1	.	OG	OG	OG	OG	.	0	.
wact-452	6155010	Chembridge	C(=O)(N1C(CN(c2ccc([N+](=O)[O-])cc2)CC1)C)c1c(F)cccc1	.	OG	OG	OG	OG	.	0	.
wact-453	6201505	Chembridge	c1(C(=O)O/N=C(/c2ccncc2)\N)c(Br)cccc1	.	OG	OG	OG	OG	.	0	.
wact-454	6221872	Chembridge	N(=C(\c1ccc(cc1)C)/N)/OC(=O)c1ccccc1	.	OG	OG	OG	OG	.	0	.
wact-455	6253520	Chembridge	n1c(noc1COc1ccccc1)c1ccncc1	.	OG	OG	OG	OG	.	0	.
wact-456	6260282	Chembridge	S(=O)(=O)(c1ccc(cc1)F)NCCSc1ccc(Cl)cc1	.	OG	OG	OG	OG	.	0	.
wact-457	6276968	Chembridge	n1c(cnc2c1cccc2)c1ccc(cc1)F	.	OG	OG	OG	OG	.	0	.
wact-458	6317095	Chembridge	N(C(=S)Nc1c(Cl)cccc1)C(=O)c1sccc1	.	OG	OG	OG	OG	.	0	.
wact-459	6328303	Chembridge	C(=O)(NC(=S)Nc1ccc(NC(=O)c2cc(Cl)ccc2)cc1)c1c(Cl)cccc1	.	OG	OG	OG	OG	.	0	.
wact-46	5426998	Chembridge	[N+](=O)(c1ccc(N2CCN(CC3C4C=CC(C3)C4)CC2)cc1)[O-]	.	OG	OG	OG	OG	.	0	.
wact-460	6364967	Chembridge	N(C(=S)Nc1c(C)cccc1)C(=O)c1sccc1	.	OG	OG	OG	OG	.	0	.
wact-461	6396103	Chembridge	c1([N+](=O)[O-])oc(C(=O)Nc2ccc(Oc3ccc(Cl)cc3)cc2)cc1	.	OG	OG	OG	OG	.	0	.
wact-462	6397073	Chembridge	N(C(=S)Nc1cc(ccc1Cl)Cl)C(=O)c1cc(c(c(c1)OC)OC)OC	.	OG	OG	OG	OG	.	0	.
wact-463	6399009	Chembridge	C(=O)(NC(=S)Nc1cc(C(F)(F)F)ccc1)c1c(F)cccc1	.	OG	OG	OG	OG	.	0	.
wact-464	6400134	Chembridge	C(=C\c1ccc(N)cc1)/C(=O)c1ccc(SC)cc1	.	OG	OG	OG	OG	.	0	.
wact-465	6408549	Chembridge	S(=O)(=O)(N(c1cc(ccc1OC)OC)CC(=O)NC1C2CC(C1)CC2)C	.	OG	OG	OG	OG	.	0	.
wact-466	6410902	Chembridge	S(=O)(=O)(N(c1cc(cc(c1)C)C)CC(=O)NC1C2CC(C1)CC2)C	.	OG	OG	OG	OG	.	0	.
wact-467	6415086	Chembridge	[N+](=O)(c1ccc(NC(=S)NCc2ccc(F)cc2)cc1)[O-]	.	OG	OG	OG	OG	.	0	.
wact-468	6431706	Chembridge	C1(=C(NC2=C(C1c1cc(O)ccc1)C(=O)CC(c1sccc1)C2)C)C(=O)OC	.	OG	OG	OG	OG	.	0	.
wact-469	6433196	Chembridge	n12c(nc3c2cccc3)SC(CC1=O)c1sccc1	.	OG	OG	OG	OG	.	0	.
wact-47	5427063	Chembridge	[N+](=O)(c1ccc(N2CCN(CC3CC=CCC3)CC2)cc1)[O-]	.	OG	OG	OG	OG	.	0	.
wact-470	6475480	Chembridge	C(=S)(Nc1c(c2c(NC(=S)Nc3ccccc3)cccc2)cccc1)Nc1ccccc1	.	OG	OG	OG	OG	.	0	.
wact-471	6477043	Chembridge	c1(C(=O)c2ccc(cc2)OCC)sccc1	.	OG	OG	OG	OG	.	0	.
wact-472	6506946	Chembridge	C(=S)(NC(=O)C)Nc1ccc(Cl)cc1	.	OG	OG	OG	OG	.	0	.
wact-473	6514639	Chembridge	c1(C(=O)NCCOc2cc(cc(c2)C)C)c(Br)cccc1	.	OG	OG	OG	OG	.	0	.
wact-474	6527401	Chembridge	n1c(scc1c1ccncc1)Nc1c(c(Cl)ccc1)C	.	OG	OG	OG	OG	.	0	.
wact-475	6537933	Chembridge	n1c(scc1c1ccncc1)Nc1c(CC)cccc1	.	OG	OG	OG	OG	.	0	.
wact-476	6541842	Chembridge	c1(oc(nn1)SCc1ccc(Br)cc1)c1occc1	.	2 adults + 20 larvae	3 adults + 3 larvae	0 worms	0 worms	.	0	.
wact-477	6544544	Chembridge	n1c(oc2c1cc(cc2)C)c1ccc(cc1)Br	.	0 worms	~120 worms	0 worms	0 worms	.	0	.
wact-478	6547065	Chembridge	c1(c(cc(c(c1)OC)OC)NC(=O)COc1c(ccc(c1)C)C)C(=O)O	.	OG	OG	OG	OG	.	0	.
wact-479	6588632	Chembridge	C(=S)(NC(=O)CC)Nc1ccc(cc1)CC	.	OG	OG	OG	OG	.	0	.
wact-48	5454916	Chembridge	N1(CCN(C2CCC(CC2)c2ccccc2)CC1)c1ccccc1	.	OG	OG	OG	OG	.	0	.
wact-480	6593819	Chembridge	[N+](=O)(c1c(cc(C(=O)Nc2cc(c(N3CCOCC3)cc2)Cl)cc1)C)[O-]	.	OG	OG	OG	OG	.	0	.
wact-481	6631407	Chembridge	n1c(scc1c1ccc(cc1)Cl)CC(=O)OCC	.	OG	OG	OG	OG	.	0	.
wact-482	6633977	Chembridge	C(C(=O)NCc1c(Cl)cccc1)(Cl)(Cl)Cl	.	OG	OG	OG	OG	.	0	.
wact-483	6634179	Chembridge	n1c2c(O)cccc2ccc1/C=C/c1sc(cc1)Br	.	35 adults + ~100 larvae	OG - fewer worms	OG	OG	.	0	.
wact-484	6636256	Chembridge	c1(C(=O)O/N=C(/c2ccccc2)\N)c(cc(cc1)C)Cl	.	OG	OG	OG	OG	.	0	.
wact-485	6637635	Chembridge	C(C(=O)NCc1ccc(Cl)cc1)(Cl)(Cl)Cl	.	OG	OG	OG	OG	.	0	.
wact-486	6662527	Chembridge	N(C(=O)c1ccccc1)C(=S)NCCCC	.	OG	OG	OG	OG	.	0	.
wact-487	6690113	Chembridge	c1(c(=O)c2c(oc1)cc(OC(C)C)cc2)Oc1ccccc1	.	OG	OG	OG	OG	.	0	.
wact-488	6848756	Chembridge	c12n(ncc1c1cc(Br)ccc1)c(cc(n2)C)C	.	OG	OG	OG	OG	.	0	.
wact-489	6854417	Chembridge	[N+](=O)(c1cc(C(F)(F)F)ccc1NCC(=O)Nc1cc(SC(F)(F)F)ccc1)[O-]	.	OG	OG	OG	OG	.	0	.
wact-49	5459938	Chembridge	N1(c2ccc(cc2)F)CCN(C2CCC(CC2)c2ccccc2)CC1	.	OG	OG	OG	OG	.	0	.
wact-490	6874401	Chembridge	c1(C(=O)c2sc(cc2)Br)oc2c(c1)cccc2	.	OG	OG	OG	OG	.	0	.
wact-491	6973723	Chembridge	c1(C(F)(F)F)c(ccc(NC(=O)C2CCN(C(=O)c3cc(cc(c3)OC)OC)CC2)c1)Cl	.	OG	OG	OG	OG	.	0	.
wact-492	6977865	Chembridge	c12c(ncnc1ccc(c2)Br)N(CC=C)CC=C.Cl	.	OG	OG	OG	OG	.	0	.
wact-493	7019645	Chembridge	N(=C(\c1ccccc1)/N)/OC(=O)Cc1sccc1	.	OG	OG	OG	OG	.	0	.
wact-494	7138732	Chembridge	C(=O)(c1c(C)cccc1)NCCSC1CCCCC1	.	OG	OG	OG	OG	.	0	.
wact-495	7224424	Chembridge	C1(=C(N=C(NC1c1ccc(cc1)Cl)S)C)C(=O)OC(C)C	.	OG	OG	OG	OG	.	0	.
wact-496	7226857	Chembridge	c1(C(=O)NCCC2=CCCCC2)c(OC)cccc1	.	OG	OG	OG	OG	.	0	.
wact-497	7411184	Chembridge	[N+](=O)(c1cc(c(N2CC(N(C(=O)CCC)CC2)C)cc1C)F)[O-]	.	OG	OG	OG	OG	.	0	.
wact-498	7426700	Chembridge	c1(c(=O)c2c(oc1)cc(cc2)OCC)c1ccc(cc1)Br	.	0 worms	0 worms	1 L1	2 L1s	.	0	.
wact-499	7514069	Chembridge	C(=O)(c1cc(c(cc1)Cl)Cl)Nc1ccc(CN2CCOCC2)cc1	.	OG	OG	OG	OG	.	0	.
wact-5	5352532	Chembridge	c1(oc(nn1)SCC=C)c1c(cc(cc1)Cl)Cl	.	OG	OG	OG	OG	.	0	.
wact-50	5556756	Chembridge	[N+](=O)(c1ccc(N2CCN(C(=O)C(c3ccccc3)CC)CC2)cc1)[O-]	.	OG	OG	OG	OG	.	0	.
wact-500	7550596	Chembridge	c1(n[nH]c(c1)c1ccc(cc1)Br)C(F)(F)F	.	OG	OG	OG	OG	.	0	.
wact-501	7559174	Chembridge	c1(C(F)(F)F)c(N2CCN(C(=O)c3cc(c(cc3)Cl)Cl)CC2)ccc([N+](=O)[O-])c1	.	OG	OG	OG	OG	.	0	.
wact-502	7560626	Chembridge	n1c(c2c([N+](=O)[O-])cccc2)onc1c1ccc(cc1)OC	.	OG	OG	OG	OG	.	0	.
wact-503	7568929	Chembridge	S(=O)(=O)(C(CC(=O)c1ccccc1)c1ccc(N(C)C)cc1)c1ccc(NC(=O)C)cc1	.	OG	OG	OG	OG	.	0	.
wact-504	7581972	Chembridge	N(C(=S)Nc1cc(NC(=O)CCCC)ccc1)C(=O)c1cc2c(OCCO2)cc1	.	OG	OG	OG	OG	.	0	.
wact-505	7616240	Chembridge	O(c1ccc(cc1)CO)Cc1ccc(I)cc1	.	OG	OG	OG	OG	.	0	.
wact-506	7629624	Chembridge	n1c(noc1c1cc(ccc1)C)c1ccccc1	.	OG	OG	OG	OG	.	0	.
wact-507	7629983	Chembridge	n1c(c2c(ccc(c2)Cl)Cl)onc1c1ncccc1	.	OG	OG	OG	OG	.	0	.
wact-508	7630016	Chembridge	c1(C(=O)NCCSc2c(C)cccc2)c(Br)cccc1	.	OG	OG	OG	OG	.	0	.
wact-509	7632618	Chembridge	C(=O)(Nc1c(c(Cl)ccc1)OC)c1cc(Cl)ccc1	.	OG	OG	OG	OG	.	0	.
wact-51	5631017	Chembridge	IC1=CC=CC(=C1)C1=NN=C(O1)C1=CC=CC=C1	.	OG	OG	OG	OG	.	0	.
wact-510	7632815	Chembridge	[N+](=O)(c1ccc(/C=C/c2nc3c(OC(=O)CC)cccc3cc2)cc1)[O-]	.	0 worms	0 worms	0 worms	0 worms	.	0	.
wact-511	7633057	Chembridge	N1(C(=O)C(c2ccc([N+](=O)[O-])cc2)C)c2c(CCC1)cccc2	.	OG	OG	OG	OG	.	0	.
wact-512	7633365	Chembridge	c1(C(=O)CCNc2ccc(SCCCC)cc2)occc1	.	OG	OG	OG	OG	.	0	.
wact-513	7637664	Chembridge	[N+](=O)(c1cc(COc2ccc(F)cc2)ccc1)[O-]	.	OG	OG	OG	OG	.	0	.
wact-515	7653692	Chembridge	n1nc2c(n1CCc1ccccc1)cccc2	.	OG	OG	OG	OG	.	0	.
wact-516	7664300	Chembridge	C(=O)(Nc1nc(c(cc1)Br)C)c1sccc1	.	OG	OG	OG	OG	.	0	.
wact-517	7670825	Chembridge	c12c(c3c(s2)nc(c2c3CC(OC2)(C)C)N2CCOCC2)ncn(c1=O)c1ccccc1	.	OG	OG	OG	OG	.	0	.
wact-518	7678546	Chembridge	S(=O)(=O)(Nc1cc(C(=O)OC)ccc1C)c1ccc(cc1)OCC	.	OG	OG	OG	OG	.	0	.
wact-519	7680488	Chembridge	[N+](=O)(c1cc(c(N2CCN(C(=O)CCCC)CC2)cc1C)F)[O-]	.	OG	OG	OG	OG	.	0	.
wact-52	5650134	Chembridge	c1(C(=O)NCCCC)c(I)cccc1	.	OG	OG	OG	OG	.	0	.
wact-520	7684635	Chembridge	C(=O)(c1sccc1)NCc1c(cc(cc1)Cl)Cl	.	OG	OG	OG	OG	.	0	.
wact-521	7688376	Chembridge	c1(C(=O)NC(c2ccccc2)C)c(ccc(c1)Br)OCC	.	OG	OG	OG	OG	.	0	.
wact-522	7694258	Chembridge	c1(nc2c(s1)cc(cc2)C)c1ccc(NC(=O)COCC)cc1	.	OG	OG	OG	OG	.	0	.
wact-523	7700089	Chembridge	c1(nc2c(s1)cc(cc2)OC)NC(=O)C1OCCC1	.	OG	OG	OG	OG	.	0	.
wact-524	7701902	Chembridge	N(C(=S)Nc1ccc(F)cc1)C(=O)C1CC1	.	OG	OG	OG	OG	.	0	.
wact-525	7705966	Chembridge	c1(ncccn1)SCCCOc1cc2c(cc1)cccc2	.	OG	OG	OG	OG	.	0	.
wact-526	7708417	Chembridge	n1c2c(OC)cccc2ccc1/C=C/c1c(cc(c(c1)OC)OC)OC	.	OG	OG	OG	OG	.	0	.
wact-527	7713229	Chembridge	c1(C2C(=C(NC3=C2C(=O)CC(C3)c2ccc(cc2)F)C)C(=O)OC)c(=O)c2c(oc1)ccc(c2)Cl	.	OG	OG	OG	OG	.	0	.
wact-528	7722777	Chembridge	C(=S)(Nc1c(F)cccc1)Nc1cc(c(cc1)Cl)Cl	.	OG	OG	OG	OG	.	0	.
wact-529	7723236	Chembridge	C(=S)(Nc1cc(cc(c1)C)C)Nc1cc(ccc1)C	.	OG	OG	OG	OG	.	0	.
wact-53	5653912	Chembridge	[N+](=O)(c1ccc(N2CCN(C(=O)c3cc(c(cc3)Cl)Cl)CC2)cc1)[O-]	.	OG	OG	OG	OG	.	0	.
wact-530	7723630	Chembridge	C(=S)(Nc1cc(c(cc1)Cl)Cl)Nc1cc(Cl)ccc1	.	OG	OG	OG	OG	.	0	.
wact-531	7726046	Chembridge	c1(c(COc2c(cc(cc2)CNCc2cnccc2)OC)ccc(c1)Cl)Cl.Cl	.	OG	OG	OG	OG	.	0	.
wact-532	7728316	Chembridge	C(=O)(c1c(Cl)cccc1)NC(c1cc2c(cc1)CCCC2)C	.	OG	OG	OG	OG	.	0	.
wact-533	7731647	Chembridge	C(c1cc(NC(=S)Nc2c(F)cccc2)ccc1)(F)(F)F	.	OG	OG	OG	OG	.	0	.
wact-534	7744522	Chembridge	c1(nc2c([nH]1)ccc(NC(=O)c1sccc1)c2)c1sccc1	.	OG	OG	OG	OG	.	0	.
wact-535	7746375	Chembridge	c1(C(=O)Nc2cc(c(N3CCN(CC3)CC)cc2)Cl)cc2c(cc1OC)cccc2	.	OG	OG	OG	OG	.	0	.
wact-536	7752851	Chembridge	c1(nc(n[nH]1)/C=C/c1ccc(F)cc1)c1c(O)cccc1	.	OG	OG	OG	OG	.	0	.
wact-537	7755655	Chembridge	N(=C(\c1ccc(cc1)Cl)/N)/OC(=O)c1c(cc(cc1)C)C	.	OG	OG	OG	OG	.	0	.
wact-538	7757149	Chembridge	C(=S)(NC(=O)C)Nc1c(cc(cc1)I)CC	.	OG	OG	OG	OG	.	0	.
wact-539	7757230	Chembridge	c1(C(=O)Nc2cc(c(N3CCN(C(=O)C(C)C)CC3)cc2)Cl)oc(cc1)Br	.	OG	OG	OG	OG	.	0	.
wact-54	5686969	Chembridge	n1c(noc1COc1ccc(Cl)cc1)c1cnccc1	.	OG	OG	OG	OG	.	0	.
wact-540	7779682	Chembridge	c1(C(=O)O/N=C(/c2ncccc2)\N)c(ccc(c1)Br)Cl	.	OG	OG	OG	OG	.	0	.
wact-541	7781412	Chembridge	C(=N\OC(=O)C(Oc1ccc(Br)cc1)C)(/c1ncccc1)\N	.	OG	OG	OG	OG	.	0	.
wact-542	7781713	Chembridge	C(=O)(c1ccc(OCc2ccc(F)cc2)cc1)CC	.	OG	OG	OG	OG	.	0	.
wact-543	7788872	Chembridge	C(=S)(Nc1c(cc(OC(F)F)cc1)C)NCCc1ccccc1	.	OG	OG	OG	OG	.	0	.
wact-544	7801584	Chembridge	C(=O)(N1CCN(c2ccc([N+](=O)[O-])cc2)CC1)Nc1c(cc(cc1)F)F	.	OG	OG	OG	OG	.	0	.
wact-545	7844614	Chembridge	C(=O)(c1c(OC)cccc1)Nc1ccc(N2CCN(C(=O)c3ccc(cc3)C)CC2)cc1	.	OG	OG	OG	OG	.	0	.
wact-546	7856988	Chembridge	n1c(scc1c1ncccc1)Nc1c(Br)cccc1	.	OG	OG	OG	OG	.	0	.
wact-547	7877602	Chembridge	n1c(scc1c1ccncc1)Nc1c(C)cccc1	.	OG	OG	OG	OG	.	0	.
wact-548	7940229	Chembridge	c1(C(=O)NCCSc2ccc(cc2)C)c(SC)cccc1	.	OG	OG	OG	OG	.	0	.
wact-549	7955970	Chembridge	c1(nc2c(s1)cccc2)c1ccc(OC(=O)C)cc1	.	OG	OG	OG	OG	.	0	.
wact-55	5688274	Chembridge	n1c(c2ccc(cc2)OC)ccc(c1)CCCCC	.	OG	OG	OG	0 worms	.	0	.
wact-550	7960454	Chembridge	c12c(sc(c1)C)ncnc2NCCc1ccccc1.Cl	.	OG	OG	OG	OG	.	0	.
wact-551	7972525	Chembridge	n1c(c2c(cc(cc2)Cl)Cl)csc1SC1C(=O)OCC1	.	OG	OG	OG	OG	.	0	.
wact-552	7997770	Chembridge	c1(C(=O)NCC2CCCCC2)c(I)cccc1	.	OG	OG	OG	OG	.	0	.
wact-553	7999813	Chembridge	n1c(oc2c1cc(cc2)OC)c1cc(c(cc1)OC)N	.	OG	OG	OG	OG	.	0	.
wact-554	9000138	Chembridge	n1(ncc(c1)I)Cc1ccc(Cl)cc1	.	OG	OG	OG	OG	.	0	.
wact-555	9004658	Chembridge	S(=O)(=O)(N1CCCCCC1)c1cc(c(cc1)OCC)C	.	OG	OG	OG	OG	.	0	.
wact-556	9005761	Chembridge	n1c(noc1c1ccc(cc1)OCC)c1cc(OC)ccc1	.	OG - fewer worms	0 worms	23 adults + 25 larvae	0 worms	.	0	.
wact-557	9008240	Chembridge	c1(C(=O)NCc2c(cc(cc2)Cl)Cl)c(F)cccc1	.	OG	OG	OG	OG	.	0	.
wact-558	9008591	Chembridge	n1c(noc1c1ccc(OCC(C)C)cc1)c1cnccc1	.	OG	OG	OG	OG	.	0	.
wact-559	9009646	Chembridge	N1(CCOc2c(cc(cc2)I)C)CCOCC1.Cl	.	OG	OG	OG	OG	.	0	.
wact-56	5754492	Chembridge	[O-][N+](=O)C1=CC=C(C=C1)N1CCN(CC1)C1CC(=O)N(C1=O)C1=C(F)C=CC=C1	.	OG	OG	OG	0 worms	.	0	.
wact-560	9010683	Chembridge	C(=O)(Nc1c(Cl)cccc1)c1ccc(cc1)CC	.	OG	OG	OG	OG	.	0	.
wact-561	9012591	Chembridge	n1c(noc1c1ccc(OCC(C)C)cc1)c1ccncc1	.	OG	OG	OG	OG	.	0	.
wact-562	9013891	Chembridge	C(=O)(Nc1cc(c(N2CCN(CC2)C)cc1)Cl)c1cc(c(cc1)C)C	.	OG	OG	OG	OG	.	0	.
wact-563	9014873	Chembridge	c1(C(=O)NCc2ccc(F)cc2)c(SC)cccc1	.	OG	OG	OG	OG	.	0	.
wact-564	9016378	Chembridge	n1c(noc1COc1cc(Cl)ccc1)c1ccccc1	.	OG	OG	OG	OG	.	0	.
wact-565	9016871	Chembridge	c1(nc2c(o1)cc(N)cc2)c1c(C)cccc1	.	OG	OG	OG	OG	.	0	.
wact-566	9016892	Chembridge	c1(nc(on1)Cc1ccc(Cl)cc1)c1sccc1	.	OG	OG	OG	OG	.	0	.
wact-567	9024695	Chembridge	n1c(noc1c1cc(N(C)C)ccc1)c1ccccc1	.	OG	OG	OG	OG	.	0	.
wact-568	9025566	Chembridge	c1(C(=O)NCCCc2ccccc2)c(SC)cccc1	.	OG	OG	OG	OG	.	0	.
wact-569	9027972	Chembridge	C(=O)(c1c(Br)cccc1)Nc1ccc(cc1)OCC=C	.	OG	OG	OG	OG	.	0	.
wact-57	6005917	Chembridge	n1c(oc2c1cc(cc2)CC)c1cc(c(cc1)C)N	.	OG	OG	OG	OG	.	0	.
wact-570	9028223	Chembridge	n1c(onc1c1ccc(NC(=O)c2c(F)cccc2)cc1)c1sccc1	.	0 worms	0 worms	0 worms	0 worms	.	0	.
wact-571	9029893	Chembridge	c1(nc2c(o1)cccc2)c1cc(c(cc1)N)C	.	OG	OG	OG	OG	.	0	.
wact-572	9029930	Chembridge	n1c(noc1CN1CCC(CC1)C)c1ccccc1.Cl	.	OG	OG	OG	OG	.	0	.
wact-573	9033734	Chembridge	C(=O)(Nc1cc(c(cc1)F)Cl)OC(C)(C)C	.	OG	OG	OG	OG	.	0	.
wact-574	9035389	Chembridge	n1c(noc1c1ccccc1)c1ccc(cc1)OC	.	OG	OG	OG	OG	.	0	.
wact-575	9036483	Chembridge	n1c(nnn1Cc1cc(c(cc1)Cl)Cl)c1ccncc1	.	OG	OG	OG	OG	.	0	.
wact-576	9037975	Chembridge	c1(ncnc(c1)C)Nc1ccc(Cl)cc1	.	OG	OG	OG	OG	.	0	.
wact-577	9039023	Chembridge	n1c(cc(nc1)C)SCc1ccc(Cl)cc1	.	OG	OG	OG	OG	.	0	.
wact-578	9040453	Chembridge	c1(noc(c1)c1ccc(cc1)C)C(=O)OC	.	OG	OG	OG	OG	.	0	.
wact-579	9041091	Chembridge	n1c(noc1c1cc(F)ccc1)c1cnccc1	.	OG	OG	OG	OG	.	0	.
wact-58	6039582	Chembridge	n1c(noc1c1ccc(cc1)Cl)c1ncccc1	.	OG	OG	OG	OG	.	0	.
wact-580	9043563	Chembridge	c1(C(=O)Nc2ccc(OC(F)F)cc2)c(cc(cc1)F)Cl	.	OG	OG	OG	OG	.	0	.
wact-581	9045026	Chembridge	C(=O)(c1cc(Oc2ccccc2)ccc1)NCCC	.	OG	OG	OG	OG	.	0	.
wact-582	9062978	Chembridge	c1(nc(no1)c1ccc(cc1)F)C(=O)NC(c1ccccc1)C	.	OG	OG	OG	OG	.	0	.
wact-583	9065374	Chembridge	S(=O)(=O)(c1c(c(c(cc1)OC)C)C)N1CCCCCC1	.	OG	OG	OG	OG	.	0	.
wact-584	9065871	Chembridge	C(=O)(Nc1c(Cl)cccc1)c1ccc(cc1)OCC#C	.	OG	OG	OG	OG	.	0	.
wact-585	9067226	Chembridge	c12c(c3c(n1CCC)cccc3)nnc(n2)SCc1ccncc1	.	OG	OG	OG	OG	.	0	.
wact-586	9069602	Chembridge	c1(nc(no1)c1ccc(cc1)Cl)C(=O)NC(c1ccccc1)C	.	OG	OG	OG	OG	.	0	.
wact-587	5175165	Chembridge	[N+](=O)(c1cc2c(nc1)cc(cc2)OC)[O-]	.	OG	OG	OG	OG	.	0	.
wact-588	5223671	Chembridge	c1(C(=O)/C=C/c2ccc(cc2)OC)c(O)cccc1	.	OG	OG	OG	OG	.	0	.
wact-589	5229759	Chembridge	n1c(noc1c1ccccc1)c1ccccc1	.	OG	OG	OG	OG	.	0	.
wact-59	6064540	Chembridge	n1c(noc1c1sccc1)c1c(C)cccc1	.	OG	OG	OG	OG	.	0	.
wact-590	5245762	Chembridge	c1(nc(cs1)c1ccccc1)NC(=O)c1sccc1	.	OG	OG	OG	OG	.	0	.
wact-591	5327935	Chembridge	C(=O)(Nc1c(cc(cc1)F)F)c1ccc(cc1)OC	.	OG	OG	OG	OG	.	0	.
wact-592	5328628	Chembridge	C(=O)(c1c(OC)cccc1)Nc1c(cc(cc1)F)F	.	OG	OG	OG	OG	.	0	.
wact-593	5361748	Chembridge	[N+](=O)(c1ccc(cc1)OCCCCCSC(C)C)[O-]	.	OG	OG	OG	OG	.	0	.
wact-594	5547756	Chembridge	[N+](=O)(c1cc(c(NCc2ccccc2)cc1)C)[O-]	.	OG	OG	OG	OG	.	0	.
wact-595	5603961	Chembridge	C1(CC(=O)N2CCN(c3ncccc3)CC2)c2c(Oc3c1cccc3)cccc2	.	OG	OG	OG	OG	.	0	.
wact-596	5649594	Chembridge	FC1=CC=CC=C1NC1=NC(=CS1)C1=CC=CC=C1	.	OG	OG	OG	OG	.	0	.
wact-597	5705546	Chembridge	n1c(nsc1N)SCc1ccccc1	.	OG	OG	OG	OG	.	0	.
wact-598	5784060	Chembridge	ClC1=CC=C(C=C1)N1CCN(CC1)N=CC1=CC=CN=C1	.	OG	OG	OG	OG	.	0	.
wact-599	5802718	Chembridge	C(=N\OC(=O)c1ccc(cc1)Cl)(/c1cnccc1)\N	.	OG	OG	OG	OG	.	0	.
wact-6	5419367	Chembridge	[N+](=O)(c1ccc(N2CCN(C3CCC(CC3)CC)CC2)cc1)[O-]	.	OG	OG	OG	OG	.	0	.
wact-60	6098764	Chembridge	n1(c(nc2c(c1=O)cccc2)SCC=C)c1c(OC)cccc1	.	OG	OG	OG	OG	.	0	.
wact-600	5947437	Chembridge	n1c(oc2c1cc(N)cc2)c1ccc(cc1)OC	.	OG	OG	OG	OG	.	0	.
wact-601	6154807	Chembridge	c1(n[nH]c(c1)c1ccc(cc1)OC)c1c(cc(cc1)OC)O	.	OG	OG	OG	OG	.	0	.
wact-602	6297648	Chembridge	n1c(oc2c1cc(N)cc2)c1cc(c(cc1)Br)C	.	OG	OG	OG	OG	.	0	.
wact-603	7620194	Chembridge	c12c(sc(c1)c1ccccc1)ncnc2SC	.	OG	OG	OG	OG	.	0	.
wact-604	7627103	Chembridge	n1c(noc1CCCOc1ccccc1)c1ccc(cc1)OC	.	OG	OG	OG	OG	.	0	.
wact-606	7641400	Chembridge	C(=O)(N1CCCCC1)c1ccc(COc2ccc(Cl)cc2)cc1	.	OG	OG	OG	OG	.	0	.
wact-607	7673432	Chembridge	N1C(=O)C(Sc2c1cc(C(F)(F)F)cc2)CC(=O)Nc1ccc(NC(=O)C)cc1	.	OG	OG	OG	OG	.	0	.
wact-608	7697479	Chembridge	c1(nc2c([nH]1)cccc2)c1scnc1	.	OG	OG	OG	OG	.	0	.
wact-609	7750501	Chembridge	n1c(noc1/C=C/c1ccccc1)c1ccc(NC(=O)c2occc2)cc1	.	0 worms	0 worms	0 worms	0 worms	.	0	.
wact-610	7940707	Chembridge	c1(C(=O)NCCSC(C)(C)C)c(SC)cccc1	.	OG	OG	OG	OG	.	0	.
wact-611	9027085	Chembridge	n1c(onc1c1ccc(cc1)C)c1ncccc1	.	OG	OG	OG	OG	.	0	.
wact-612	9034393	Chembridge	c12[nH]c3c(c1ccc1c2ccc(n1)N1CCN(CC1)C)cccc3	.	OG	OG	OG	OG	.	0	.
wact-613	9036498	Chembridge	n1c(noc1c1cc2c(cc1)cccc2)c1cnccc1	.	0 worms	0 worms	0 worms	0 worms	.	0	.
wact-614	9039813	Chembridge	c1(c2c(cc(cc2)Cl)Cl)oc(cc1)CNC1CC1.Cl	.	OG	OG	OG	OG	.	0	.
wact-615	9065979	Chembridge	n1c(C(=O)NC(c2ccccc2)C)onc1c1sccc1	.	OG	OG	OG	OG	.	0	.
wact-616	9066648	Chembridge	C#CCOC1=CC=C(C=C1)C1=NC(=NO1)C1=NC=CC=C1	.	OG	OG	OG	OG	.	0	.
wact-617	5270737	Chembridge	c1(nc2c([nH]1)cccc2)c1ncsc1	.	OG	OG	OG	OG	.	0	.
wact-618	7701507	Chembridge	n12c(nc3c(c1=O)cccc3)scc2C	.	OG	OG	OG	OG	.	0	.
wact-619	5223930	Chembridge	c1(oc(nn1)c1ccccc1)C(F)(F)F	.	OG	OG	OG	OG	.	0	.
wact-62	6269333	Chembridge	n1c(noc1COc1ccccc1)c1ccccc1	.	OG	OG	OG	OG	.	0	.
wact-620	5245497	Chembridge	c1(nc(cs1)c1ccc(cc1)C)NC(=O)c1occc1	.	OG	OG	OG	OG	.	0	.
wact-621	5250046	Chembridge	c1(nc2c(s1)cccc2)c1c(cc(cc1)N)O	.	~100 worms	3 adults + 20 larvae	OG	0 worms	.	0	.
wact-622	5373894	Chembridge	C(=C\c1ccc(cc1)OC)/c1ncccc1	.	OG	OG	OG	OG	.	0	.
wact-623	5481021	Chembridge	c1(cc(n[nH]1)c1c(cc(cc1)C)O)c1c(Cl)cccc1	.	OG	OG	OG	OG	.	0	.
wact-624	5840058	Chembridge	c1(C(=O)Nc2ncc(Br)cc2)oc2c(c1)cccc2	.	OG	OG	OG	OG	.	0	.
wact-625	6033630	Chembridge	c1(=N)n(c2c(n1CC(c1cc(c(cc1)Cl)Cl)O)cccc2)Cc1c(C)cccc1.Cl	.	OG	OG	OG	OG	.	0	.
wact-626	7275478	Chembridge	c1(nc2c([nH]1)cccc2)NC(=O)c1occc1	.	OG	OG	OG - unc, dpy	OG - unc, dpy	.	0	.
wact-627	7617859	Chembridge	N(c1ccc(Br)cc1)CC(COc1ccc(cc1)OC)O	.	OG	OG	OG	OG	.	0	.
wact-628	7634309	Chembridge	c12c(cc(OCC(=O)NC)cc2)ccc(c1)Br	.	OG	OG	OG	OG	.	0	.
wact-629	7659998	Chembridge	n1c2n(cc1c1ccc(NC(=O)c3c(F)cccc3)cc1)cccc2	.	OG	OG	OG	3 adults + 50 larvae	.	0	.
wact-63	6505890	Chembridge	c1(oc(nn1)SCc1cc(Br)ccc1)c1occc1	.	OG	OG	OG	OG	.	0	.
wact-630	7726002	Chembridge	c1(C(=O)Nc2ccc(cc2)OCC)nsnc1	.	OG	OG	OG	OG	.	0	.
wact-631	7741110	Chembridge	N1(c2ccc(NCc3ccc(F)cc3)cc2)CCN(Cc2ccccc2)CC1	.	OG	OG	OG	OG	.	0	.
wact-64	6613675	Chembridge	n1c(scc1c1ccc(cc1)CC)c1ccncc1	.	OG	OG	OG	OG	.	0	.
wact-65	6858658	Chembridge	c1(C(=O)N2CCN(c3cc(C(F)(F)F)ccc3)CC2)c(ccc(c1)Cl)Cl	.	OG	OG	OG	OG	.	0	.
wact-66	6866321	Chembridge	[N+](=O)(c1c(C(=O)Nc2ccc(Oc3ccc(Br)cc3)cc2)cccc1)[O-]	.	OG	OG	OG	OG	.	0	.
wact-67	7007662	Chembridge	C(=O)(C(=O)O)O.c1(cc(ccc1OCCCCNC(C)C)Br)Cl	.	OG	OG	OG	OG	.	0	.
wact-68	7009010	Chembridge	C(=O)(C(=O)O)O.c1(cc(ccc1Cl)OCCCCNC(C)C)Cl	.	OG	OG	OG	OG	.	0	.
wact-69	7192340	Chembridge	C(=O)(Nc1ccc(cc1)OC)c1c(C)cccc1	.	OG	OG	OG	OG	.	0	.
wact-7	5652963	Chembridge	O1N=C(N=C1C1=CC=CS1)C1=CC=CC=C1	.	OG	OG	OG	OG	.	0	.
wact-70	7484841	Chembridge	c1(nc(no1)c1ccccc1)c1c(Cl)cccc1Cl	.	OG	OG	OG	0 worms	.	0	.
wact-71	7530695	Chembridge	c1(C(=O)Nc2c(c(Cl)ccc2)Cl)n(ncc1Cl)CC	.	OG	OG	OG	OG	.	0	.
wact-72	7545212	Chembridge	N(C(=S)Nc1c(cc(cc1)I)C)C(=O)C(C)(C)C	.	OG	OG	OG	OG	.	0	.
wact-73	7560414	Chembridge	S(=O)(=O)(N1CCN(c2cc(c([N+](=O)[O-])cc2)NC2CC2)CC1)c1ccc(cc1)F	.	OG	OG	OG	OG	.	0	.
wact-74	7597064	Chembridge	c1(ncccn1)SCc1ccc(Cl)cc1	.	OG	OG	OG	OG	.	0	.
wact-75	7626205	Chembridge	C(=O)(C(=O)O)O.c1(cc(ccc1OCCN1CCNCC1)Cl)Cl	.	OG	OG	OG	OG	.	0	.
wact-76	7628716	Chembridge	C(=O)(C(=O)O)O.N1(CCCOc2ccc(I)cc2)CCNCC1	.	OG	OG	OG	OG	.	0	.
wact-77	7630350	Chembridge	c1(cc(ccc1Cl)OCCCN1CCNCC1)Cl.Cl	.	OG	OG	OG	OG	.	0	.
wact-78	7630728	Chembridge	c1(c(c(ccc1Cl)OCCCCN1CCNCC1)C)C.Cl	.	OG	OG	OG	OG	.	0	.
wact-79	7631832	Chembridge	C(=O)(C(=O)O)O.c1(cc(ccc1OCCCCN1CCNCC1)Br)Cl	.	OG	OG	OG	0 worms	.	0	.
wact-8	5652977	Chembridge	n1c(noc1c1ccc(C(C)(C)C)cc1)c1ccncc1	.	OG	OG	OG	OG	.	0	.
wact-80	7632370	Chembridge	c1(c(c(ccc1Cl)OCCN1CCNCC1)C)C.C(=O)(C(=O)O)O	.	OG	OG	OG	OG	.	0	.
wact-81	7634492	Chembridge	n1c(noc1/C=C/c1c(Cl)cccc1)c1ccncc1	.	OG	OG	OG	OG	.	0	.
wact-82	7637260	Chembridge	[N+](=O)(c1ccc(NC(=O)NCCc2ccc(F)cc2)cc1)[O-]	.	OG	OG	OG	OG	.	0	.
wact-83	7637739	Chembridge	n1c(onc1c1ccncc1)C(Oc1cc(Cl)ccc1)C	.	OG	OG	OG	OG	.	0	.
wact-84	7638484	Chembridge	n1c(noc1CSc1ccccc1)c1ncccc1	.	OG	OG	OG	OG	.	0	.
wact-85	7638556	Chembridge	c1(cc(ccc1OCCCN1CCNCC1)Br)Cl.Cl	.	OG	OG	OG	OG	.	0	.
wact-87	7648710	Chembridge	c12n(c(cc(n2)C)C(F)F)ncc1C(=O)Nc1cn(nc1)Cc1c(cc(cc1)Cl)Cl	.	OG	OG	OG	OG	.	0	.
wact-88	7656796	Chembridge	c1(C(=O)N2CCN(c3cc(c(cc3)Cl)Cl)CC2)c([N+](=O)[O-])cccc1	.	OG	OG	OG	OG	.	0	.
wact-89	7662831	Chembridge	c1(C(=O)/C=C/c2ccc(cc2)OCC)occc1	.	OG	OG	0 worms	OG	.	0	.
wact-9	5708926	Chembridge	C(=O)(Nc1ccc(Cl)cc1)c1ccc(CN2Cc3c(CC2)cccc3)cc1	.	OG	OG	OG	OG	.	0	.
wact-90	7677632	Chembridge	c1(oc2c(c1)cccc2)C(=O)Nc1ccc(N2CCN(C(=O)c3c(C)cccc3)CC2)cc1	.	OG	OG	OG	OG	.	0	.
wact-91	7680561	Chembridge	[N+](=O)(c1cc(c(N2CCN(C(=O)C(C)(C)C)CC2)cc1)F)[O-]	.	OG	OG	OG	OG	.	0	.
wact-92	7683066	Chembridge	c1(ncccn1)SCc1cc(c(cc1)Cl)Cl	.	OG	OG	OG	OG	.	0	.
wact-93	7695043	Chembridge	n1(c(nc2c1cccc2)c1scnc1)Cc1c(F)cccc1	.	OG	OG	OG	OG	.	0	.
wact-94	7714779	Chembridge	c1(c2ccccc2)ccc(cc1)OCCCNC.Cl	.	OG	OG	OG	OG	.	0	.
wact-95	7716519	Chembridge	C(=O)(C(=O)O)O.c1(cc(ccc1OCCNC1CCCC1)Br)Cl	.	OG	OG	OG	OG	.	0	.
wact-96	7721731	Chembridge	c1(c(COc2c(cc(cc2)CNCCO)OC)ccc(c1)Cl)Cl.Cl	.	OG	OG	OG	OG	.	0	.
wact-97	7722941	Chembridge	c1(c(COc2ccc(cc2)CNCCO)ccc(c1)Cl)Cl.Cl	.	OG	OG	OG	OG	.	0	.
wact-98	7739526	Chembridge	c1(c(cc(cc1OC)CNCCO)Cl)OCc1c(cc(cc1)Cl)Cl.Cl	.	OG	OG	0 worms	OG	.	0	.
wact-99	7747049	Chembridge	C(=O)(c1occc1)Nc1cc(c(N2CCN(CC2)CC)cc1)Cl	.	OG	OG	0 worms	OG	.	0	.
